# Supplementary material for: Health-related quality of life and associated factors in Chinese menstrual migraine patients: a cross-sectional study
Source: BMC Womens Health. 2022 May 15;22:177. doi: 10.1186/s12905-022-01760-8 (PMC9107648; doi:10.1186/s12905-022-01760-8)
Supplement: Supplementary file 2 — Additional file 2. Data and materials. [file 12905_2022_1760_MOESM2_ESM.xls]

## Sheet: Sheet1
姓名	序号	M类型	民族	年龄	身高	体重	BMI	发病年龄	始发年龄	头痛持续时间	教育程度	先兆	VAS评分	程度	每月头痛天数	家族史	绝望	乐观	睡眠	掩饰	自杀意念总分	有无自杀意念	HIT-6	HAMD分数	HAMD分级	HAMA分数	HAMA分级	家庭支持	朋友支持	其他	PSSS总分	分层	生理功能	生理职能	躯体疼痛	总体健康	生命活力	社会功能	情感职能	心理健康	健康变化	生理综合评分PSS	心理综合评分MSS	生活质量评分	睡眠分型	睡眠质量	入睡时间	睡眠时间	睡眠效率
任莹	3	MM	汉族	21	1.65	54	19.8347	10-15岁	<20	<24h	大学及以上	无	5	中度	2	有	2	2	3	1	7	无	58	8	无抑郁症状≤8	5	＜7没有焦虑症状	14	20	18	52	支持状态	95	100	74	52	75	77.78	0	60	75	80.25	53.195	66.7225		2	3	1	0
赵秀飞	7	MM	汉族	21	1.55	49	20.3954		<20	<24h	大学及以上	无	2	轻度	4	有	4	1	3	0	8	无	38	12	可能有抑郁，8-20	9	≥7分可能有焦虑	19	14	17	50	支持状态	100	100	62	62	75	77.78	33.33	80	25	80.25	53.195	66.7225		0	0	0	0
王会英	29	MM	汉族	21.95	1.66	60	21.7738	大于20岁	20-30	24-72h	大学及以上	无	8	重度	3	无	0	0	1	0	1	无	76	12	可能有抑郁，8-20	17	≥14肯定有焦虑	19	22	18	59	支持状态	80	50	74	40	65	87.5	33.33	66.67	25	61	63.125	62.0625		2	1	2	2
钟聪	37	MM	汉族	22	1.65	57	20.9366	15-20岁	<20	<24h	大学及以上	无	5	中度	4	有	3	1	4	0	8	无	59	15	可能有抑郁，8-20	6	＜7没有焦虑症状	19	21	18	58	支持状态	100	100	62	57	80	100	33.33	84	50	79.75	74.3325	77.0413		2	2	1	0
沈纪萍	51	MM	汉族	22	1.69	62	21.7079	10-15岁	<20	<24h	大学及以上	无	5	中度	1	有	8	0	3	1	11	无	52	16	可能有抑郁，8-20	6	＜7没有焦虑症状	26	24	27	77	高支持状态	90	100	90	40	55	88	0	60	50	80	50.75	65.375		1	2	1	0
肖吉娟	64	MM	汉族	24	1.57	50	20.2848	15-20岁	<20	<24h	大学及以上	无	5	中度	1	无	3	0	1	0	4	无	42	15	可能有抑郁，8-20	6	＜7没有焦虑症状	24	24	22	70	高支持状态	100	100	62	35	70	88.89	0	56	50	74.25	53.7225	63.9862		0	1	0	0
王静梅	96	MM	汉族	22	1.61	55	21.2183	10-15岁	<20	<24h	大学及以上	有	5	中度	20	有	9	3	2	0	14	有	66	31	肯定有抑郁，≥20	34	≥29可能为严重焦虑	17	18	22	57	支持状态	65	0	62	45	45	55.56	0	48	25	43	37.14	40.07		2	2	2	0
何霜	97	MM	汉族	21	1.63	49	18.4425	15-20岁	<20	<24h	大学及以上	无	5	中度	4	有	1	0	0	1	1	无	63	1	无抑郁症状≤8	3	＜7没有焦虑症状	23	27	28	78	高支持状态	95	75	74	72	85	77.78	66.67	80	75	79	77.3625	78.1813		0	1	1	0
谢菲	99	MM	汉族	21	1.57	61	24.7475		<20	<24h	大学及以上	无	2	轻度	1	无	7	2	1	2	10	无	43	14	可能有抑郁，8-20	8	≥7分可能有焦虑	25	22	24	71	高支持状态	90	75	74	55	65	88.89	0	66.67	50	73.5	55.14	64.32		1	1	1	0
张琛	108	MM	其他	22	1.58	43	17.2248	15-20岁	<20	<24h	大学及以上	无	2	轻度	1	有	8	2	4	1	14	有	61	15		12		22	19	20	61	高支持状态	90	0	52	25	50	44.44	0	20	25	41.75	28.61	35.18		3	3	2	1
黄诗祁	119	MM	汉族	23	1.55	50	20.8117	15-20岁	<20	<24h	大学及以上	无	5	中度	4	有	9	1	2	0	12	有	58	7	无抑郁症状≤8	9	≥7分可能有焦虑	16	22	23	61	高支持状态	85	100	64	52	70	77.78	0	56	50	75.25	50.945	63.0975		1	3	1	0
王婧莹	127	MM	汉族	22	1.58	50	20.0288	15-20岁	<20	<24h	大学及以上	无	5	中度	1	无	3	1	2	1	6	无	57	8	无抑郁症状≤8	8	≥7分可能有焦虑	23	21	24	68	高支持状态	100	100	80	77	70	100	33.33	64	50	89.25	66.8325	78.0413		1	1	1	0
刘万娇	135	MM	汉族	21			20.2674		<20	<24h	大学及以上	有	2	轻度	3	有	3	0	3	1	6	无	50	27	肯定有抑郁，≥20	15	≥14肯定有焦虑	14	18	15	47	支持状态	85	0	74	35	60	77.78	0	40	25	48.5	44.445	46.4725		2	0	2	0
李垚垚	136	MM	汉族	23	1.58	46	18.4265	10-15岁	<20	<24h	大学及以上	无	5	中度	5	有	7	2	3	1	12	有	65	15	可能有抑郁，8-20	5	＜7没有焦虑症状	23	22	20	65	高支持状态	100	25	52	40	60	77.78	33.33	56	25	54.25	56.7775	55.5138		2	2	2	0
郑月	155	MM	汉族	20	1.68	53	18.7783		<20	<24h	大学及以上	无	5	中度	4	有	4	2	3	2	9	无	47	12	可能有抑郁，8-20	12		14	19	16	49	支持状态	100	100	62	50	50	55.56	33.33	40	0	78	44.7225	61.3612		2	0	1	0
陈呈	175	MM	汉族	20	1.68	53	18.7783		<20	<24h	大学及以上	无	5	中度	8	有	5	0	3	0	8	无	59	27	肯定有抑郁，≥20	26	≥21肯定有明显焦虑	20	22	19	61	高支持状态	95	25	62	40	65	66.67	0	60	25	55.5	47.9175	51.7088		2	2	0	0
刘丹	178	MM	汉族	20			20.2674	10-15岁	<20	<24h	大学及以上	无	5	中度	4	无	4	0	2	1	6	无	49	10	可能有抑郁，8-20	5	＜7没有焦虑症状	25	24	20	69	高支持状态	75	25	90	77	65	77.78	0	66.67	50	66.75	52.3625	59.5562		0	1	0	0
王琪	201	MM	汉族	20	1.58	46	18.4265		<20	<24h	大学及以上	无	3	轻度	4	有	8	0	2	0	10	无	63	16	可能有抑郁，8-20	5	＜7没有焦虑症状	20	20	21	61	高支持状态	70	0	62	40	50	66.67	66.67	48	50	43	57.835	50.4175		1	2	1	1
汪晨	204	MM	汉族	19	1.52	50	21.6413		<20	<24h	大学及以上	无	5	中度	1	无	1	0	0	2	1	无	56	2	无抑郁症状≤8	1	＜7没有焦虑症状	26	23	24	73	高支持状态	90	75	90	77	70	100	100	76	50	83	86.5	84.75		1	0	0	0
成一鸣	210	MM	汉族	20	1.6	48	18.75	15-20岁	<20	<24h	大学及以上	无	5	中度	2	有	9	2	1	0	12	有	52	32	肯定有抑郁，≥20	26	≥21肯定有明显焦虑	16	18	16	50	支持状态	55	75	62	35	45	44.44	66.67	32	0	56.75	47.0275	51.8888		2	0	1	0
唐菊	240	MM	汉族	20	1.56	46	18.902	10-15岁	<20	<24h	大学及以上	无	5	中度	25	有	5	0	4	2	9	无	69	15	可能有抑郁，8-20	21	≥21肯定有明显焦虑	13	19	19	51	支持状态	100	75	74	30	55	77.78	100	48	25	69.75	70.195	69.9725		3	3	0	0
张钰洁	242	MM	汉族	19	1.57	53	21.5019		<20	<24h	大学及以上	无	5	中度	4	无	3	0	1	0	4	无	53	20		13		20	24	24	68	高支持状态	100	75	62	72	75	88.89	33.33	76	75	77.25	68.305	72.7775		1	1	2	0
李雅晴	251	MM	汉族	22	1.57	52	21.0962	15-20岁	<20	<24h	大学及以上	无	2	轻度	1	无	4	0	3	1	7	无	53	13	可能有抑郁，8-20	23	≥21肯定有明显焦虑	24	20	19	63	高支持状态	80	25	62	55	70	77.78	66.67	52	50	55.5	66.6125	61.0562		1	1	1	0
李同兴	259	MM	汉族	21	1.55	42	17.4818	15-20岁	<20	<24h	大学及以上	无	5	中度	5	无	9	2	2	1	13	有	76	22	肯定有抑郁，≥20	10	≥7分可能有焦虑	22	26	23	71	高支持状态	70	0	62	40	45	66.67	0	32	50	43	35.9175	39.4588		1	1	1	0
邓楠芳	289	MM	汉族	20	1.59	48.8	19.303	15-20岁	<20	<24h	大学及以上	无	3	轻度	1	有	2	0	2	1	4	无	43	13	可能有抑郁，8-20	3	＜7没有焦虑症状	22	24	24	70	高支持状态	100	0	74	77	70	88.89	0	76	50	62.75	58.7225	60.7362		1	1	1	0
刘玉琳	300	MM	汉族	24	1.61	40	15.4315	5-10岁	<20	<24h	大学及以上	无	2	轻度	2	有	4	0	1	0	5	无	57	12	可能有抑郁，8-20	7	≥7分可能有焦虑	23	20	19	62	高支持状态	100	75	62	67	60	88.89	33.33	64	75	76	61.555	68.7775		0	1	0	0
唐然	308	MM	汉族	19	1.65	60	22.0386		<20	<24h	大学及以上	有	2	轻度	5	无	2	0	0	0	2	无	52	18	可能有抑郁，8-20	15	≥14肯定有焦虑	19	20	18	57	支持状态	95	75	74	72	65	77.78	0	72	50	79	53.695	66.3475		1	1	1	0
邱敏	314	MM	汉族	20		46	20.2674		<20	<24h	大学及以上	无	2	轻度	22	有	11	5	3	0	19	有	69	16	可能有抑郁，8-20	17	≥14肯定有焦虑	4	4	16	24	低支持状态	75	25	74	67	35	66.67	0	44	50	60.25	36.4175	48.3338		2	2	2	0
曾正婷	346	MM	汉族	18	1.58	44	17.6254	10-15岁	<20	<24h	大学及以上	有	5	中度	7	有	1	1	0	0	2	无	66	24	肯定有抑郁，≥20	22	≥21肯定有明显焦虑	21	24	21	66	高支持状态	90	25	52	62	55	66.67	33.33	60	75	57.25	53.75	55.5		1	0	1	0
黄媛	347	MM	汉族	20	1.56	42	17.2584	15-20岁	<20	<24h	大学及以上	无	5	中度	2	有	3	0	2	2	5	无	52	22	肯定有抑郁，≥20	26	≥21肯定有明显焦虑	24	24	23	71	高支持状态	95	100	52	45	65	77.78	0	52	25	73	48.695	60.8475		2	3	2	0
余甜田	368	MM	其他	21.95	1.56	45	18.4911	15-20岁	<20	<24h	大学及以上	无	5	中度	8	有	4	1	1	0	6	无	64	9	可能有抑郁，8-20	11	≥7分可能有焦虑	22	23	25	70	高支持状态	95	25	52	42	65	77.78	33.33	64	25	53.5	60.0275	56.7638		1	1	0	0
吴佳	371	MM	汉族	20	1.63	54	20.3244		<20	<24h	大学及以上	有	5	中度	10	有	7	1	4	3	12	有	52	31	肯定有抑郁，≥20	19	≥14肯定有焦虑	19	19	17	55	支持状态	100	0	74	57	50	66.67	0	48	75	57.75	41.1675	49.4588		1	1	1	0
王思虹	386	MM	汉族	23	1.65	50.2	18.4389	15-20岁	<20	<24h	大学及以上	有	5	中度	3	有	3	0	1	1	4	无	61	11	可能有抑郁，8-20	6	＜7没有焦虑症状	22	19	21	62	高支持状态	95	50	74	57	65	100	33.33	66.67	25	69	66.25	67.625		0	0	1	1
王彬茹	389	MM	汉族	27	1.58	51	20.4294	15-20岁	<20	<24h	大学及以上	无	5	中度	4	有	4	0	3	1	7	无	53	12	可能有抑郁，8-20	7	≥7分可能有焦虑	21	24	24	69	高支持状态	100	100	74	77	75	100	100	66.67	75	87.75	85.4175	86.5837		2	1	1	0
张霞	391	MM	汉族	24	1.58	53	21.2306		<20	<24h	大学及以上	无	4	中度	2	无	5	0	1	2	6	无	63	8	可能有抑郁，8-20	3	＜7没有焦虑症状	21	24	24	69	高支持状态	100	100	90	72	80	100	33.33	76	25	90.5	72.3325	81.4163		1	1	2	0
陈川	393	MM	汉族	23	1.55	42	17.4818	15-20岁	<20	<24h	大学及以上	无	5	中度	2	无	11	0	3	2	14	有	64	24	肯定有抑郁，≥20	11	≥7分可能有焦虑	13	26	23	62	高支持状态	90	0	84	40	40	55.56	0	44	75	53.5	34.89	44.195		2	2	2	0
乃古有作	400	MM	汉族	25	1.57	51	20.6905	10-15岁	<20	<24h	大学及以上	无	5	中度	1	无	1	0	0	0	1	无	61	8	可能有抑郁，8-20	7	≥7分可能有焦虑	25	26	24	75	高支持状态	100	50	84	90	95	100	66.67	80	100	81	85.4175	83.2087		0	1	1	0
阿乌康玲	403	MM	汉族	21	1.65	45	16.5289	10-15岁	<20	<24h	大学及以上	有	5	中度	1	有	1	0	2	1	3	无	73	8	可能有抑郁，8-20	8	≥7分可能有焦虑	21	18	19	58	支持状态	80	25	80	30	70	44.44	100	72	75	53.75	71.61	62.68		2	3	1	1
杨丹奕	408	MM	汉族	19	1.59	52	20.5688	5-10岁	<20	<24h	大学及以上	无	6	中度	1	有	5	1	1	0	7	无	50	3	无抑郁症状≤8	16	≥14肯定有焦虑	12	21	23	56	支持状态	100	75	32	35	60	77.78	66.67	66.67	75	60.5	67.78	64.14		0	1	0	0
王红宇	410	MM	汉族	22	1.5	48	21.3333	15-20岁	<20	<24h	大学及以上	无	5	中度	4	有	4	0	2	0	6	无	61	15	可能有抑郁，8-20	16	≥14肯定有焦虑	17	24	22	63	高支持状态	90	25	74	57	50	66.67	33.33	52	50	61.5	50.5	56		1	3	0	0
田茂菲	416	MM	汉族	20	1.52	42	18.1787	5-10岁	<20	<24h	大学及以上	无	3	轻度	3	有	6	1	1	3	8	无	41	20	肯定有抑郁，≥20	18	≥14肯定有焦虑	24	23	24	71	高支持状态	80	100	74	35	55	77.78	0	48	25	72.25	45.195	58.7225		2	1	2	1
林琬滨	420	MM	汉族	18	1.56	44	18.0802	15-20岁	<20	<24h	大学及以上	无	5	中度	3	无	6	0	4	0	10	无	48	30	肯定有抑郁，≥20	21	≥21肯定有明显焦虑	26	26	26	78	高支持状态	95	100	74	50	70	66.67	66.67	48	50	79.75	62.835	71.2925		2	1	1	0
许青	434	MM	汉族	20	1.7	72	24.9135	10-15岁	<20	<24h	大学及以上	有	8	重度	5	有	7	1	4	2	12	有	78	21	肯定有抑郁，≥20	12	≥7分可能有焦虑	26	28	25	79	高支持状态	95	75	52	20	45	66.67	100	52	50	60.5	65.9175	63.2088		2	0	1	0
浦琦	439	MM	汉族	20	1.64	52	19.3337	15-20岁	<20	<24h	大学及以上	无	5	中度	6	有	4	1	4	1	9	无	58	10	可能有抑郁，8-20	18	≥14肯定有焦虑	9	24	22	55	支持状态	95	0	62	50	50	77.78	0	48	25	51.75	43.945	47.8475		2	3	1	0
聂可	441	MM	汉族	19	1.59	49	19.3821	10-15岁	<20	<24h	大学及以上	无	5	中度	1	有	3	0	0	1	3	无	47	15	可能有抑郁，8-20	8	≥7分可能有焦虑	23	23	24	70	高支持状态	70	100	74	45	65	88.89	33.33	68	100	72.25	63.805	68.0275		0	1	1	1
冯敏	459	MM	汉族	19	1.67	56	20.0796	15-20岁	<20	<24h	大学及以上	无	2	轻度	4	有	3	1	2	0	6	无	49	5	无抑郁症状≤8	3	＜7没有焦虑症状	20	21	25	66	高支持状态	95	100	90	57	65	100	100	52	75	85.5	79.25	82.375		1	2	1	0
顾漫蜜	490	MM	汉族	20	1.55	70	29.1363	10-15岁	<20	<24h	大学及以上	无	1	轻度	3	有	6	1	3	0	10	无	58	30	肯定有抑郁，≥20	21	≥21肯定有明显焦虑	20	22	23	65	高支持状态	95	0	74	40	50	77.78	33.33	60	25	52.25	55.2775	53.7638		2	2	2	0
王馨悦	514	MM	汉族	20	1.64	53	19.7055	10-15岁	<20	<24h	大学及以上	无	2	中度	3	有	4	1	1	0	6	无	58	15	可能有抑郁，8-20	6	＜7没有焦虑症状	14	8	17	39	支持状态	90	75	74	52	40	55.56	33.33	40	25	72.75	42.2225	57.4862		1	0	1	0
吴晓蝶	516	MM	汉族	19	1.6	45	17.5781	15-20岁	<20	<24h	大学及以上	无	4	中度	3	有	7	1	3	0	11	无	65	10	可能有抑郁，8-20	7	≥7分可能有焦虑	25	27	28	80	高支持状态	95	75	84	62	65	77.78	100	72	50	79	78.695	78.8475		1	1	0	0
王淼	533	MM	汉族	20	1.55	48	19.9792	10-15岁	<20	<24h	大学及以上	无	2	轻度	1	有	7	2	2	1	11	无	57	15	可能有抑郁，8-20	10	≥7分可能有焦虑	17	22	19	58	支持状态	85	100	74	50	40	100	0	36	50	77.25	44	60.625		2	1	1	0
贺露瑶	538	MM	汉族	18	1.55	45	18.7305		<20	<24h	大学及以上	无	2	轻度	2	有	0	0	1	0	1	无	40	15		6	＜7没有焦虑症状	24	24	23	71	高支持状态	90	75	84	77	80	100	100	72	100	81.5	88	84.75		0	1	0	0
胡静	543	MM	汉族	20	1.5	45	20		<20	<24h	大学及以上	无	3	轻度	2	无	10	3	2	0	15	有	64	18	可能有抑郁，8-20	14	≥14肯定有焦虑	16	19	17	52	支持状态	75	50	74	45	35	88.89	0	44	25	61	41.9725	51.4862		2	2	2	0
唐琦娅	547	MM	汉族	19	1.67	53	19.0039		<20	<24h	大学及以上	有	5	中度	3	有	5	0	1	0	6	无	67	26	肯定有抑郁，≥20	19	≥14肯定有焦虑	13	21	22	56	支持状态	85	25	74	57	50	55.56	0	32	25	60.25	34.39	47.32		1	0	1	0
张小容	560	MM	汉族	18	1.58	56	22.4323	15-20岁	<20	<24h	大学及以上	无	2	轻度	1	有	8	0	3	0	11	无	75	12	可能有抑郁，8-20	19	≥14肯定有焦虑	18	26	26	70	高支持状态	70	50	52	45	75	77.78	33.33	64	75	54.25	62.5275	58.3888		2	1	2	0
陈媛媛	566	MM	汉族	20	1.63	53	19.9481	15-20岁	<20	<24h	大学及以上	无	3	轻度	1	有	6	1	2	1	9	无	45	13	可能有抑郁，8-20	7	≥7分可能有焦虑	12	16	16	44	支持状态	95	100	84	55	40	88.89	33.33	44	75	83.5	51.555	67.5275		1	0	1	0
张月月	573	MM	汉族	19	1.67	50	17.9282	10-15岁	<20	<24h	大学及以上	有	5	中度	3	有	9	0	3	0	12	有	62	19	可能有抑郁，8-20	26	≥21肯定有明显焦虑	12	13	13	38	支持状态	95	0	52	40	40	55.56	0	28	50	46.75	30.89	38.82		2	2	0	0
肖尹	590	MM	汉族	21	1.62	49	18.6709	15-20岁	<20	<24h	大学及以上	无	5	中度	1	无	4	0	2	1	6	无	61	4	无抑郁症状≤8	2	＜7没有焦虑症状	15	22	23	60	支持状态	90	75	80	60	50	77.78	66.67	52	50	76.25	61.6125	68.9313		1	2	0	0
李莉	611	MM	其他	20	1.56	49.5	20.3402		<20	<24h	大学及以上	无	5	中度	3	有	1	0	2	0	3	无	37	8	无抑郁症状≤8	4	＜7没有焦虑症状	26	27	24	77	高支持状态	85	75	84	77	85	88.89	66.67	80	50	80.25	80.14	80.195
吴施	629	MM	汉族	20	1.57	52	21.0962	15-20岁	<20	<24h	大学及以上	无	7	重度	4	有	9	1	4	0	14	有	70	33	肯定有抑郁，≥20	29	≥21肯定有明显焦虑	13	20	19	52	支持状态	80	50	52	40	45	55.56	100	32	25	55.5	58.14	56.82		2	3	2	0
李亚萍	630	MM	汉族	21	1.55	43	17.898		<20	<24h	大学及以上	无	2	轻度	1	有	4	0	1	0	5	无	40	5	无抑郁症状≤8	5	＜7没有焦虑症状	12	22	22	56	支持状态	95	100	84	67	80	100	100	72	75	86.5	88	87.25		1	2	0	0
谢贤秋	631	MM	汉族	21	1.63	45	16.937	10-15岁	<20	<24h	大学及以上	无	3	轻度	6	有	4	0	3	1	7	无	40	5	无抑郁症状≤8	6	＜7没有焦虑症状	25	23	24	72	高支持状态	70	25	62	40	75	88.89	33.33	76	50	49.25	68.305	58.7775		2	2	0	1
彭彦茗	647	MM	汉族	20	1.64	51	18.9619	15-20岁	<20	<24h	大学及以上	无	3	轻度	5	有	9	2	3	2	14	有	52	25	肯定有抑郁，≥20	17	≥14肯定有焦虑	17	19	18	54	支持状态	85	25	62	40	50	77.78	33.33	48	25	53	52.2775	52.6388		2	3	2	2
李晓红	652	MM	汉族	20	1.59	55	21.7555	10-15岁	<20	<24h	大学及以上	无	5	中度	4	有	8	1	3	2	12	有	63	12	可能有抑郁，8-20	17	≥14肯定有焦虑	22	20	23	65	高支持状态	80	25	62	62	50	44.44	0	48	25	57.25	35.61	46.43		2	3	1	0
魏海媚	656	MM	汉族	18	1.55	44	18.3143	15-20岁	<20	<24h	大学及以上	无	3	轻度	1	有	4	0	1	0	5	无	53	16	可能有抑郁，8-20	17	≥14肯定有焦虑	22	20	22	64	高支持状态	90	75	84	50	70	88.89	66.67	64	50	74.75	72.39	73.57		2	1	0	0
李诗	658	MM	汉族	21	1.61	64	24.6904	15-20岁	<20	<24h	大学及以上	无	6	中度	1	有	5	1	1	1	7	无	64	14	可能有抑郁，8-20	24	≥21肯定有明显焦虑	19	22	21	62	高支持状态	95	0	84	47	60	100	33.33	56	75	56.5	62.3325	59.4162		1	0	2	0
陈梦秋	661	MM	汉族	21	1.49	62	27.9267	15-20岁	<20	<24h	大学及以上	无	5	中度	1	有	4	0	2	1	6	无	68	8	无抑郁症状≤8	11	≥7分可能有焦虑	25	17	14	56	高支持状态	100	100	62	55	50	66.67	33.33	60	50	79.25	52.5	65.875		1	1	1	0
杨睿	671	MM	汉族	20	1.59	53	20.9644	10-15岁	<20	<24h	大学及以上	无	6	中度	3	有	7	1	1	0	9	无	71	13	可能有抑郁，8-20	12	≥7分可能有焦虑	18	23	20	61	支持状态	90	75	74	77	60	77.78	33.33	52	50	79	55.7775	67.3888		1	0	1	0
傅德霞	676	MM	汉族	19	1.62	54	20.5761	15-20岁	<20	<24h	大学及以上	无	2	轻度	1	有	2	0	3	1	5	无	52	15	可能有抑郁，8-20	13	≥7分可能有焦虑	14	27	26	67	高支持状态	100	100	90	35	75	77.78	66.67	72	50	81.25	72.8625	77.0563		2	1	1	0
伍易艳	684	MM	汉族	20	1.65	52	19.1001	10-15岁	<20	<24h	大学及以上	有	5	中度	1	无	7	1	2	0	10	无	65	12	可能有抑郁，8-20	5	＜7没有焦虑症状	25	21	24	70	高支持状态	95	100	84	72	65	88.89	0	72	100	87.75	56.4725	72.1112		1	1	2	0
张雨	689	MM	汉族	18	1.65	53	19.4674	15-20岁	<20	<24h	大学及以上	无	2	轻度	3	有	6	2	2	1	10	无	53	9	可能有抑郁，8-20	4	＜7没有焦虑症状	8	22	19	49	高支持状态	85	75	84	57	40	100	66.67	66.67	25	75.25	68.335	71.7925		1	2	1	0
罗文凤	729	MM	汉族	19	1.63	52	19.5717		<20	<24h	大学及以上	有	5	中度	2	有	4	2	1	0	7	无	45	6	无抑郁症状≤8	14	≥14肯定有焦虑	12	13	20	45	支持状态	90	100	84	97.5	80	100	100	88	100	92.875	92	92.4375		0	1	1	0
江珊	733	MM	汉族	18	1.72	50	16.901	10-15岁	<20	<24h	大学及以上	有	7	重度	1	无	7	3	1	2	11	无	56	30	肯定有抑郁，≥20	21	≥21肯定有明显焦虑	18	20	15	53	支持状态	20	50	74	57	65	77.78	33.33	44	75	50.25	55.0275	52.6388		0	2	0	0
王昱涵	760	MM	汉族	18	1.55	48	19.9792		<20	<24h	大学及以上	无	7	重度	2	有	8	0	3	0	11	无	68	21	肯定有抑郁，≥20	34	≥29可能为严重焦虑	21	25	24	70	高支持状态	90	100	84	50	60	77.78	33.33	66.67	50	81	59.445	70.2225		2	2	2	1
吴秀美	796	MM	其他	19	1.62	49	18.6709	15-20岁	<20	<24h	大学及以上	有	5	中度	6	有	5	1	3	1	9	无	53	8	可能有抑郁，8-20	19	≥14肯定有焦虑	17	20	20	57	支持状态	95	50	62	40	50	88.89	0	66.67	25	61.75	51.39	56.57		2	1	2	0
袁丽	801	MM	汉族	19	1.58	51	20.4294	10-15岁	<20	<24h	大学及以上	无	2	轻度	1	有	2	0	1	0	3	无	38	12	可能有抑郁，8-20	7	≥7分可能有焦虑	15	15	17	47	支持状态	75	100	84	77	80	55.56	0	60	50	84	48.89	66.445		0	0	1	0
兰英	833	MM	汉族	20			20.2674	15-20岁	<20	<24h	大学及以上	无	5	中度	2	有	8	0	2	1	10	无	50	18	可能有抑郁，8-20	31	≥29可能为严重焦虑	26	24	25	75	高支持状态	85	0	64	77	75	88.89	0	64	50	56.5	56.9725	56.7362		1	2	1	0
肖静	835	MM	汉族	19	1.55	42	17.4818		<20	<24h	大学及以上	无	5	中度	4	有	3	0	1	1	4	无	67	6	无抑郁症状≤8	3	＜7没有焦虑症状	28	28	25	81	高支持状态	95	100	90	42	70	100	100	66.67	75	81.75	84.1675	82.9587		2	2	1	1
李佳凝	885	MM	汉族	18	1.61	48	18.5178	10-15岁	<20	<24h	大学及以上	无	2	轻度	2	有	4	0	1	1	5	无	55	7	无抑郁症状≤8	2	＜7没有焦虑症状	28	28	24	80	高支持状态	95	100	74	87	70	100	100	84	75	89	88.5	88.75		1	1	2	0
吴俊	891	MM	汉族	18	1.55	55	22.8928	10-15岁	<20	<24h	大学及以上	无	4	轻度	3	无	6	0	1	0	7	无	51	23	肯定有抑郁，≥20	15	≥14肯定有焦虑	17	23	28	68	高支持状态	100	100	62	55	75	77.78	0	56	50	79.25	52.195	65.7225		0	0	1	0
米琪	986	MM	汉族	18	1.65	63	23.1405	10-15岁	<20	<24h	大学及以上	无	5	中度	1	有	6	2	4	0	12	有	71	16	可能有抑郁，8-20	10	≥7分可能有焦虑	23	21	24	68	高支持状态	95	75	52	55	50	88.89	0	52	50	69.25	47.7225	58.4862		1	1	1	0
胡鑫怡	1023	MM	汉族	18	1.53	44	18.7962	15-20岁	<20	<24h	大学及以上	无	3	轻度	1	无	4	1	3	1	8	无	43	8	无抑郁症状≤8	2	＜7没有焦虑症状	17	27	23	67	高支持状态	95	100	90	62	60	100	100	44	50	86.75	76	81.375		2	3	1	0
侯卓君	1040	MM	汉族	34	1.65	55	20.202	32	20-30	24-72h	大学及以上	无	7	重度	4	有	8	3	3	1	14	有	73	11		9		17	9	20	46	支持状态	75	0	90	87	25	88.89	0	20	50	63	33.4725	48.2362		1	1	0	0
黄文娟	1042	MM	汉族	26	1.62	59	22.4813	20	20-30	>72h	大学及以上	无	8	重度	10	无	3	1	2	0	6	无	69	10		8	可能有焦虑	24	20	17	61	高支持状态	65	25	74	67	70	66.67	100	56	25	57.75	73.1675	65.4587		0	0	0	1
刘勇	1044	MM	汉族	45	1.58	44	17.6254	29	20-30	<24h	大学及以上	无	8	重度	4	有	1	0	2	0	3	无	78	5		6	没有焦虑	24	24	24	72	高支持状态	90	0	32	35	85	77.78	100	76	25	39.25	84.695	61.9725		1	3	0	0
易欢	1048	MM	汉族	33	1.56	60	24.6548	23	20-30	24-72h	大学及以上	无	6	中度	4	有	4	0	4	0	8	无	74	17		16	肯定有焦虑	4	15	17	36	低支持状态	90	100	74	35	45	77.78	33.33	60	25	74.75	54.0275	64.3888		2	2	3	3
黄度	1052	MM	汉族	27	1.6	52	20.3125		20-30	<24h	大学及以上	无	3	轻度	6	有	3	0	3	3	6	无	66	5		9	可能有焦虑	8	15	13	36	低支持状态	95	75	74	57	60	77.78	100	56	50	75.25	73.445	74.3475		1	1	0	0
蒋兰秀	1064	MM	汉族	23	1.55	41	17.0656	18	<20	<24h	大学及以上	无	5	中度	4	有	12	5	2	0	19	有	65	29		18	可能有焦虑	16	23	19	58	支持状态	80	100	90	35	35	55.56	0	40	50	76.25	32.64	54.445		1	2	0	0
杨彩虹	1065	MM	汉族	44	1.55	41	17.0656	18	<20	<24h	大学及以上	无	6	中度	3	有	8	2	3	2	13	有	71	22		11	可能有焦虑	20	8	14	42	支持状态	65	75	52	40	50	66.67	66.67	28	50	58	52.835	55.4175		2	2	3	3
顾萍	1066	MM	汉族	49	1.63	55	20.7008	20	20-30	<24h	大学及以上	无	3	轻度	2	无	7	2	4	1	13	有	44	12		6	没有焦虑	20	15	18	53	支持状态	90	50	74	40	70	100	33.33	72	0	63.5	68.8325	66.1663		1	1	1	0
何李利	1067	MM	汉族	31	1.55	54	22.4766		20-30	<24h	大学及以上	无	3	轻度	2	有	1	0	0	1	1	无	63	3		2	没有焦虑	24	24	21	69	高支持状态	95	100	42	42	80	100	100	76	25	69.75	89	79.375		1	2	2	2
陈玉梅	1072	MM	汉族	23	1.6	47	18.3594	10	<20	<24h	大学及以上	无	3	轻度	30	无	10	2	2	2	14	有	75	21		17		5	22	18	45	支持状态	80	0	22	10	20	44.44	0	28	50	28	23.11	25.555		2	3	0	0
何玉梅	1073	MM	汉族	26	1.59	44	17.4044	24	20-30	<24h	大学及以上	无	5	中度	3	有	3	1	3	2	7	无	73	21		14	可能有焦虑	17	20	22	59	支持状态	100	0	62	40	45	66.67	0	44	25	50.5	38.9175	44.7088		2	1	0	0
吉珂莹	1074	MM	汉族	17	1.67	75	26.8923	14	<20	24-72h	高中及以下	无	7	重度	4	有	4	0	0	0	4	无	73	14		11	可能有焦虑	23	21	23	67	高支持状态	95	0	62	50	80	55.56	0	60	25	51.75	48.89	50.32		0	0	1	0
杨艳	1076	MM	汉族	26	1.6	58	22.6562	24	20-30	<24h	大学及以上	无	5	中度	3	无	3	0	2	2	5	无	71	10		8	可能有焦虑	22	17	22	61	高支持状态	90	100	84	97	50	88.89	66.67	76	50	92.75	70.39	81.57		1	0	1	0
刘惠琼	1077	MM	汉族	52	1.54	58	24.4561	30	>30	<24h	大学及以上	无	6	中度	3	无	3	0	3	3	6	无	68	10		7	没有焦虑	22	13	14	49	支持状态	85	25	74	20	55	66.67	33.33	52	50	51	51.75	51.375		1	1	0	0
田娇	1079	MM	汉族	37	1.63	53	19.9481	10	<20	24-72h	大学及以上	无	7	重度	3	有	2	0	2	1	4	无	58	6	无抑郁症状	6	没有焦虑	24	24	24	72	高支持状态	100	100	90	72	80	88.89	100	80	25	90.5	87.2225	88.8612		2	3	0	0
杜盈玉	1081	MM	汉族	18	1.5	46	20.4444	11	<20	<24h	大学及以上	无	7	重度	10	无	6	4	0	0	10	无	75	5		5		16	12	13	41	支持状态	95	25	74	60	20	77.78	66.67	60	50	63.5	56.1125	59.8062		1	0	0	1
李睿	1083	MM	汉族	47			20.2674	7	<20	24-72h	大学及以上	有	7	重度	6	无	1	0	1	1	2	无	63	4		7	没有焦虑	28	27	24	79	高支持状态	95	100	84	35	70	100	100	72	25	78.5	85.5	82		1	0	1	0
陈曦	1086	MM	汉族	21	1.6	60	23.4375	18	<20	<24h	大学及以上	无	7	重度	7	有	6	1	3	0	10	无	68	13		7	没有焦虑	13	11	11	35	低支持状态	100	0	74	25	65	77.78	0	66.67	25	49.75	52.3625	51.0562		2	2	0	0
喻小丹	1092	MM	汉族	32	1.6	52	20.3125	21	20-30	<24h	大学及以上	无	8	重度	8	有	2	0	0	0	2	无	76	20		10	可能有焦虑	12	21	22	55	支持状态	100	25	52	50	65	87.5	33.33	72	25	56.75	64.4575	60.6037		1	1	2	2
梁琦	1095	MM	汉族	34	1.63	50	18.8189	24	20-30	<24h	大学及以上	无	8	重度	4	有	3	0	4	1	7	无	65	13		6	没有焦虑	12	21	19	52	支持状态	100	0	74	35	65	44.44	0	76	0	52.25	46.36	49.305		3	3	3	3
李荣华	1226	MM	汉族	37			20.2674	37	>30	>72h	大学及以上	无	6	中度	1	有	9	2	3	2	14	有	63	17		12	可能有焦虑	23	20	24	67	高支持状态	95	50	74	35	40	100	0	48	25	63.5	47	55.25		2	1	2	0
罗欣	1229	MM	汉族	25	1.67	47	16.8525	21	20-30	<24h	大学及以上	有	8	重度	1	有	2	0	3	2	5	无	75	4		2	没有焦虑	21	28	28	77	高支持状态	90	100	90	72	75	100	100	72	25	88	86.75	87.375		1	0	0	0
李冬梅		MM	汉族	33	1.55	59	24.5578	20	20-30	<24h	大学及以上	无	4	中度	1	有	6	2	2	2	10	无	63	19		19		22	22	23	67	高支持状态	90	75	84	62	60	100	33.33	64	25	67.4641	59.3395	63.4018		2	3	1	0
覃嘉玲		MM	汉族	25	1.6	48	18.75	23	20-30	<24h	大学及以上	无	5	中度	1	无	1	0	1	0	2	无	53	2		0		26	24	26	76	高支持状态	100	50	80	65	95	88.89	100	84	50	73.75	91.9725	82.86		0	0	1	0
郑利平		MM	汉族	36	1.59	44	17.4044	29	20-30	<24h	大学及以上	无	4	中度	8	有	3	0	3	3	6	无	74	8		11		18	24	26	68	高支持状态	95	100	62	40	55	88.89	100	52	75	74.25	73.9725	74.11		2	3	3	3
何永庆		MM	汉族	35	1.7	55	19.0311	11	<20	24-72h	大学及以上	无	6	中度	3	无	1	0	1	4	7		64	5		12		24	24	26	74	高支持状态	95	50	42	52	85	77.78	100	68	25	59.75	82.695	71.22		1	1	0	0
李成英		MM	汉族	46	1.54	62	26.1427	23	20-30	>72h	大学及以上	有	9	重度	4	无	0	0	2	1	2	无	64	13		8		27	23	18	68	高支持状态	100	100	42	55	85	88.89	100	64	25	74.25	84.4725	79.36		1	0	1	0
王燕		MM	汉族	45	1.6	65	25.3906	44	>30	<24h	大学及以上	无	5	中度	3	无	3	0	1	2	4	无	52	3		4		24	23	21	68	高支持状态	70	75	62	67	75	88.89	100	64	25	68.5	81.9725	75.24		1	1	1	0
蒋丽	1	NMM	汉族	21	1.55	50.2	20.8949	15-20岁	<20	<24h	大学及以上	无	8	重度	4	有					6		62	16		8							100	0	62	62	80	100	100	52	50	56	83	69.5		1	1	0	0
刘蔼娟	9	NMM	汉族	20	1.61	65	25.0762		<20	<24h	大学及以上	无	3	轻度	4	有					9		54	14		14							65	0	52	40	65	87.5	0	52	75	39.25	51.125	45.1875		2	2	2	0
庄敏	10	NMM	汉族	21	1.64	54	20.0773	10-15岁	<20	<24h	大学及以上	无	5	中度	3	有					3		59	10		2							90	100	64	57	75	100	100	72	75	77.75	86.75	82.25		1	1	1	0
张罗姚	17	NMM	汉族	22	1.6	42	16.4062	10-15岁	<20	<24h	大学及以上	无	4	中度	4	无					7		53	4		3							100	100	74	62	70	100	66.67	64	50	84	75.1675	79.5837		1	2	1	0
米小可	19	NMM	汉族	21	1.6	52	20.3125	15-20岁	<20	<24h	大学及以上	无	8	重度	7	无					15		76	22		13							80	0	52	67	50	75	0	48	50	49.75	43.25	46.5		1	3	2	1
刘玉婷	25	NMM	汉族	22	1.62	53	20.1951	10-15岁	<20	<24h	大学及以上	无	2	轻度	1	无					7		46	12									100	100	74	77	65	100	0	72	75	87.75	59.25	73.5		2	2	1	0
柳娇	28	NMM	汉族	22	1.63	51.6	19.4211	10-15岁	<20	<24h	大学及以上	无	5	中度	4	无					3		62	6		5							100	25	64	62	65	100	100	80	50	62.75	86.25	74.5		1	0	1	0
卫文静	30	NMM	汉族	20	1.62	45	17.1468	5-10岁	<20	<24h	大学及以上	无	2	轻度	8	有					6		57	17		7							95	100	74	87	65	100	66.67	48	50	89	69.9175	79.4587		1	1	0	0
阿什曲古木	34	NMM	其他	24	1.67	62	22.231		<20	<24h	大学及以上	无	5	中度	1	无					8		42	10									75	25	52	35	60	87.5	0	80	25	46.75	56.875	51.8125		3	3	2	3
张雪美	36	NMM	汉族	21	1.63	52	19.5717	15-20岁	<20	<24h	大学及以上	无	5	中度	1	无					10		45	21		11							95	0	74	62	60	100	0	52	75	57.75	53	55.375		2	1	1	1
何亚楠	41	NMM	汉族	20	1.65	46	16.8962	15-20岁	<20	<24h	大学及以上	无	2	轻度	1	无					3		41	3		4							95	100	84	62	75	100	100	64	50	85.25	84.75	85		1	1	0	0
周静如	42	NMM	汉族	25	1.58	58	23.2335	10-15岁	<20	<24h	大学及以上	无	5	中度	2	有					3		54	9		2							100	100	74	67	80	100	0	68	25	85.25	62	73.625		1	0	1	0
张福英	43	NMM	汉族	22	1.55	45	18.7305	5-10岁	<20	<24h	大学及以上	无	2	轻度	2	有					3		55	12		7							95	100	84	67	85	100	33.33	80	75	86.5	74.5825	80.5413		1	2	1	0
李玉玲	44	NMM	汉族	26	1.55	47	19.563		<20	<24h	大学及以上	无	2	轻度	3	有					3		51	12		6							95	100	84	87	80	100	66.67	80	50	91.5	81.6675	86.5837		0	0	1	0
陈卓	45	NMM	汉族	21	1.57	49	19.8791		<20	<24h	大学及以上	有	2	轻度	2	有					6		51	22		9							90	50	74	45	70	100	66.67	64	25	64.75	75.1675	69.9587		1	1	0	0
吴雪	46	NMM	汉族	21	1.63	47	17.6898	15-20岁	<20	<24h	大学及以上	无	5	中度	4	有					2		51	1		6							95	50	74	45	75	87.5	33.33	72	25	66	66.9575	66.4788		1	2	1	1
唐文星	47	NMM	汉族	21	1.64		20.2674	15-20岁	<20	<24h	大学及以上	无	5	中度	1	有					6		50	12		8							80	0	90	50	60	100	33.33	56	25	55	62.3325	58.6662		1	1	1	0
黄方俊	50	NMM	汉族	22	1.68	49	17.3611	10-15岁	<20	<24h	大学及以上	无	5	中度	1	有					3		60	16		6							85	0	40	47	85	87.5	0	80	25	43	63.125	53.0625		0	0	1	0
黄佳彬	55	NMM	汉族	23	1.6	56	21.875	15-20岁	<20	<24h	大学及以上	无	5	中度	6	无					1			3		6							100	100	62	72	55	100	0	60	50	83.5	53.75	68.625		1	1	0	1
唐云辉	56	NMM	汉族	24	1.54	50	21.0828	15-20岁	<20	<24h	大学及以上	无	8	重度	2	无					8		54	12		8							100	100	84	57	60	100	0	64	50	85.25	56	70.625		0	1	1	1
杨天乐	57	NMM	汉族	21	1.55	48	19.9792	15-20岁	<20	<24h	大学及以上	无	2	轻度	1	无					6		59	19		7							95	50	74	55	70	100	0	64	50	68.5	58.5	63.5		2	5	0	0
万永红	60	NMM	汉族	23	1.71	55	18.8092	大于20岁	20-30	<24h	大学及以上	无	2	轻度	4	无					19		67	41		17							85	0	42	25	25	37.5	0	24	0	38	21.625	29.8125		3	3	3	3
刘沣乓	61	NMM	其他	21.95	1.72	71	23.9995	15-20岁	<20	<24h	大学及以上	无		中度	5	有					8		63	26		11							80	25	64	50	70	100	66.67	72	75	54.75	77.1675	65.9587		3	3	2	2
刘琳	63	NMM	汉族	22	1.68	56	19.8413	15-20岁	<20	<24h	大学及以上	无	5	中度	1	无					6		51	4		3							85	100	52	97	75	100	33.33	88	50	83.5	74.0825	78.7913		0	1	1	0
吴怡	71	NMM	汉族	22	1.66		20.2674	大于20岁	20-30	<24h	大学及以上	有	5	中度	4	有					3		55	4		2							85	75	64	82	75	100	66.67	76	50	76.5	79.4175	77.9587		1	1	1	0
陈佳蓉	72	NMM	汉族	22	1.58	55	22.0317	15-20岁	<20	<24h	大学及以上	无	5	中度	4	有					1		68	3		1							100	75	31	92	80	100	66.67	72	50	74.5	79.6675	77.0837		1	1	1	0
杨梦	79	NMM	汉族	23	1.52	50	21.6413	10-15岁	<20	<24h	大学及以上	无	5	中度	3	有					0		49	0		1							100	100	74	92	75	100	100	80	50	91.5	88.75	90.125		0	0	1	0
唐小侰	80	NMM	汉族	22	1.55	43	17.898	10-15岁	<20	<24h	大学及以上	无	5	中度	1	无					2		56	3		0							100	100	90	77	80	100	0	88	50	91.75	67	79.375		0		0	0
王琪	83	NMM	汉族	22	1.6	40	15.625		<20	<24h	大学及以上	无	5	中度	20	无					11		67	22									90	25	52	35	30	100	0	48	25	50.5	44.5	47.5		3	3	2	0
韩林烜	85	NMM	汉族	21	1.68	54	19.1327	15-20岁	<20	<24h	大学及以上	无	5	中度	1	无					2		45	5		2							95	100	80	50	65	100	100	72	25	81.25	84.25	82.75		0	0	0	0
王魏华	88	NMM	汉族	22	1.57	50	20.2848	10-15岁	<20	<24h	大学及以上	无	5	中度	1	无					10		58	1		13							95	75	74	30	70	100	0	64	50	68.5	58.5	63.5		2	1	1	0
杨思敏	89	NMM	汉族	22	1.68	57	20.1956	15-20岁	<20	<24h	大学及以上	无	5	中度	1	无					5		60	11		7							100	100	84	62	80	100	66.67	68	50	86.5	78.6675	82.5837		1	1	2	0
张彩会	90	NMM	汉族	22	1.54	46	19.3962	10-15岁	<20	<24h	大学及以上	无	5	中度	1	有					7		53	11		15							95	75	84	67	65	100	100	68	50	80.25	83.25	81.75		1	1	1	0
代明珠	104	NMM	汉族	21	1.58	45.8	18.3464	15-20岁	<20	<24h	大学及以上	无	2	轻度	1	无					3		45	3		0							95	100	90	72	75	100	100	72	50	89.25	86.75	88		0	0	0	0
张莉	105	NMM	汉族	22	1.55	48	19.9792	15-20岁	<20	<24h	大学及以上	有	8	重度	1	无					4		50	0		0							95	100	62	50	65	87.5	0	60	50	76.75	53.125	64.9375		1	2	1	0
张相双	106	NMM	汉族	22	1.58	48	19.2277	15-20岁	<20	<24h	大学及以上	无	5	中度	3	无					4		47	2									100	100	74	35	75	100	0	84	75	77.25	64.75	71		1	2	1	1
吴鑫美	107	NMM	汉族	23	1.58	56	22.4323		<20	24-72h	大学及以上	无	5	中度	1	无					6		64	11		7							95	100	84	65	70	100	0	80	50	86	62.5	74.25		0	1	0	0
廖茂兰	111	NMM	汉族	22	1.58	48	19.2277		<20	<24h	大学及以上	无		中度	1	无					2		59	6		5							95	100	84	62	60	100	33.33	64	25	85.25	64.3325	74.7913		1	1	0	0
戴依梦	115	NMM	汉族	22	1.58	43	17.2248	15-20岁	<20	<24h	大学及以上	无	5	中度	2	有					7		67	9		4							95	50	74	50	75	100	0	72	50	67.25	61.75	64.5		1	2	0	0
王一西	126	NMM	汉族	22	1.56	45	18.4911	15-20岁	<20	<24h	大学及以上	无	5	中度	1	无					1		49	9									95	50	84	62	80	100	33.33	68	75	72.75	70.3325	71.5413		0	1	1	0
冯康春	129	NMM	汉族	22	1.6	50	19.5312		<20	<24h	大学及以上	无	5	中度	7	有					1		59	3									100	50	90	55	85	100	33.33	92	50	73.75	77.5825	75.6663		1	2	1	0
陈佳佳	141	NMM	其他	21	1.61	53	20.4467		<20	<24h	大学及以上	无	2	轻度	4	有					12		62	21		11							100	25	84	77	55	100	0	64	75	71.5	54.75	63.125		2	1	2	2
曹倩	147	NMM	汉族	23	1.62	41	15.6226		<20	<24h	大学及以上	无	5	中度	4	有					10		75	18		12							95	0	42	30	60	100	66.67	0	25	41.75	56.6675	49.2088		3	1	1	2
左颖	152	NMM	汉族	19	1.6	53	20.7031		<20	<24h	大学及以上	无	5	中度	1	无					8		75	19		8							90	25	74	67	65	87.5	66.67	56	25	64	68.7925	66.3962		2	1	2	0
彭利君	153	NMM	汉族	18	1.56	50	20.5457		<20	<24h	大学及以上	无	2	轻度	3	无					3		57	22		12							100	25	84	72	70	100	33.33	68	25	70.25	67.8325	69.0413		2	0	0	0
刘欣星	156	NMM	汉族	20	1.6	50	19.5312		<20	<24h	大学及以上	无	5	中度	1	无					3		57	10		1							100	50	90	87	60	100	0	60	50	81.75	55	68.375		0	0	1	0
余会琴	160	NMM	汉族	20	1.6	48	18.75	15-20岁	<20	<24h	大学及以上	无	5	中度	1	无					2		50	7		3							100	100	84	62	70	100	100	76	75	86.5	86.5	86.5		1	1	1	0
林依	161	NMM	汉族	21	1.6	40	15.625	10-15岁	<20	<24h	大学及以上	无	2	轻度	10	无					9		57	33		18							75	75	90	30	35	100	66.67	72	0	67.5	68.4175	67.9587		2	2	2	0
向君	163	NMM	汉族	18	1.68	48	17.0068	15-20岁	<20	<24h	大学及以上	无	5	中度	3	无					10		64	18		16							55	0	74	45	45	87.5	0	60	75	43.5	48.125	45.8125		2	1	1	2
粟婷	167	NMM	汉族	20	1.62	45	17.1468	10-15岁	<20	<24h	大学及以上	有	5	中度	1	无					14		54	33		9							85	0	74	35	55	100	0	48	25	48.5	50.75	49.625		2	1	0	0
查雨汐	170	NMM	汉族	18	1.68	65	23.03	10-15岁	<20	<24h	大学及以上	无	4	中度	3	有					16		65			12							100	50	84	77	55	100	0	56	75	77.75	52.75	65.25		0	1	2	0
张子言	171	NMM	汉族	19	1.75	85	27.7551	15-20岁	<20	<24h	大学及以上	无	5	中度	5	无					18		67	30		25							85	50	74	45	30	100	33.33	44	50	63.5	51.8325	57.6662		2	3	2	1
何胤霖	177	NMM	汉族	20	1.5	38	16.8889		<20	<24h	大学及以上	有	5	中度	2	无					10		51	27		14							85	100	84	45	45	75	66.67	36	50	78.5	55.6675	67.0837		2	2	1	0
刘宇	179	NMM	汉族	20	1.6	48	18.75		<20	<24h	大学及以上	无	2	轻度	10	有					4		53	26		16							75	75	74	40	60	100	0	56	50	66	54	60		2	2	1	0
周俊秋	180	NMM	汉族	19	1.53	44	18.7962	10-15岁	<20	<24h	大学及以上	无	2	轻度	4	有					7		51	11		3							85	50	84	67	55	100	33.33	60	50	71.5	62.0825	66.7913		2	1	0	0
张晓萱	184	NMM	汉族	19	1.63	45	16.937		<20	<24h	大学及以上	无	5	中度	2	有					4		62	20		9							95	75	84	52	50	100	0	72	50	76.5	55.5	66		2	1	0	0
卿珊珊	185	NMM	汉族	19	1.62	51	19.433	15岁	<20	<24h	大学及以上	无	5	中度	1	有					8		56	13		13							95	100	90	45	55	100	33.33	56	50	82.5	61.0825	71.7913		2	3	1	0
颜秋	186	NMM	汉族	19	1.58	50	20.0288		<20	24-72h	大学及以上	无	5	中度	3	有					8		56	29		21							70	100	64	57	65	77.5	0	60	75	72.75	50.625	61.6875		1	2	2	0
陈黛岱	189	NMM	汉族	20	1.6	46	17.9688	12岁	<20	<24h	大学及以上	无	8	重度	8	有					14			18		21							90	0	52	35	65	100	0	48	50	44.25	53.25	48.75		2	3	1	0
彭梦华	191	NMM	汉族	19	1.55	50	20.8117	10-15岁	<20	<24h	大学及以上	有	5	中度	3	有					8		48	20									85	50	74	57	55	100	33.33	44	25	66.5	58.0825	62.2912		2	1	2	2
王娅	194	NMM	汉族	20	1.67	51	18.2868	5-10岁	<20	<24h	大学及以上	无		轻度	4	有					3		62	8		7							95	0	74	45	80	100	66.67	80	100	53.5	81.6675	67.5837		3	3	2	2
张艺轩	195	NMM	汉族	18	1.75	54	17.6327		<20	<24h	大学及以上	无		轻度	4	无					2		44	4		3							100	100	90	52	65	100	100	56	50	85.5	80.25	82.875		1	1	0	0
黄玉莹	196	NMM	汉族	20	1.67	53	19.0039	10-15岁	<20	<24h	大学及以上	无		中度	4	无					8		61	9		1							100	100	74	62	70	100	0	60	25	84	57.5	70.75		1	2	1	0
敬竹韵	199	NMM	汉族	18	1.55	43.5	18.1061	10-15岁	<20	<24h	大学及以上	无	4	中度	25	无					12		56	27		18							100	25	84	40	35	100	0	48	50	62.25	45.75	54		3	3	2	2
彭颖熠	200	NMM	汉族	19	1.61	55	21.2183		<20	<24h	大学及以上	无	2	轻度	6	无					6		52	15		5							80	75	74	60	55	100	100	68	75	72.25	80.75	76.5		1	1	0	0
李佳	209	NMM	汉族	19	1.62	50	19.052	10-15岁	<20	<24h	大学及以上	无	5	中度	4	有					2		58	3		1							100	100	84	77	70	100	0	72	50	90.25	60.5	75.375		0	0	1	2
董姝	213	NMM	汉族	19	1.63	47	17.6898	5-10岁	<20	>72h	大学及以上	无	2	轻度	4	无					15		65	41		23							60	25	51	40	40	75	0	28	75	44	35.75	39.875		3	3	3	3
李友梅	214	NMM	汉族	20	1.54	58	24.4561	5-10岁	<20	<24h	大学及以上	无		中度	4	有					5		42	14		13							95	100	84	62	65	100	100	68	25	85.25	83.25	84.25		1	3	2	1
王悦苏	216	NMM	汉族	20	1.53	52	22.2137	15-20岁	<20	<24h	大学及以上	无		轻度	5	无					5		44	12		7							100	100	74	77	35	100	0	60	50	87.75	48.75	68.25		1	0	1	0
张赫西	217	NMM	汉族	20	1.7	51	17.6471	15-20岁	<20	<24h	大学及以上	有		中度	1	无					7		36	17		9							100	25	10	75	35	75	0	44	25	52.5	38.5	45.5		2	3	1	0
魏茜茜	219	NMM	汉族	20	1.63	49	18.4425	15-20岁	<20	<24h	大学及以上	无		中度	2	无							47	13		10							90	100	84	52	75	100	100	68	50	81.5	85.75	83.625		1	0	1	0
范丁山	220	NMM	汉族	20	1.6	47	18.3594	15-20岁	<20	<24h	大学及以上	无		轻度	4	无					4		55	7		10							90	75	52	42	80	100	100	72	50	64.75	88	76.375		2	1	1	0
格桑卓玛	222	NMM	其他	21	1.58	52	20.83	5-10岁	<20	<24h	大学及以上	无		中度	2	无					11		51	29		6							85	25	62	40	45	87.5	66.67	60	50	53	64.7925	58.8963		1	2	0	0
赵露露	223	NMM	汉族	20	1.58	45	18.026		<20	<24h	大学及以上	无		中度	1	无					5		40	11		5							100	100	84	52	80	100	66.67	68	50	84	78.6675	81.3337		0	0	0	0
冉巧	231	NMM	汉族	21	1.63	58	21.83	15-20岁	<20	<24h	大学及以上	无	2	轻度	3	无					4		64	8		4							100	25	62	50	55	87.5	0	64	50	59.25	51.625	55.4375		2	1	1	0
邓娟	232	NMM	汉族	20	1.65	51	18.7328	5-10岁	<20	<24h	大学及以上	无	2	中度	25	无					11		60	19		6							85	0	74	45	50	87.5	66.67	48	50	51	63.0425	57.0213		1	1	2	0
唐小茜	233	NMM	汉族	19	1.6	57	22.2656	15-20岁	<20	<24h	大学及以上	无	5	中度	10	无					5		59	22		8							100	100	84	67	70	100	66.67	60	50	87.75	74.1675	80.9587		0	2	1	0
谢晓	245	NMM	汉族	20	1.63	48.5	18.2544	10-15岁	<20	<24h	大学及以上	有	2	轻度	2	有					4		42	11		7							95	100	84	72	80	100	33.33	92	50	87.75	76.3325	82.0413		1	1	1	0
刘茜	258	NMM	汉族	20	1.6	56	21.875	15-20岁	<20	<24h	大学及以上	无	2	轻度	5	有					10			30		24							95	100	84	62	45	87.5	66.67	64	50	85.25	65.7925	75.5212		2	2	1	1
郭珈伶	264	NMM	汉族	20	1.63	52	19.5717	10-15岁	<20	<24h	大学及以上	无	5	中度	1	无					5		34	3		4							90	100	90	92	80	100	33.33	84	100	93	74.3325	83.6663		1	2	0	0
陈佳丽	265	NMM	汉族	19	1.64	54	20.0773	15-20岁	<20	<24h	大学及以上	无	2	轻度	0	无					-1		47	16		19							100	0	64	25	60	100	0	64	50	47.25	56	51.625		2	3	2	1
田悦	269	NMM	汉族	20	1.58	59	23.634		<20	<24h	大学及以上	无	5	中度	1	有					17			26		11							85	75	62	35	45	87.5	0	52	75	64.25	46.125	55.1875		1	1	1	0
潘文丽	270	NMM	汉族	18	1.64	60	22.3081		<20	<24h	大学及以上	无	2	轻度	1	无					8		40	6		7							95	100	100	57	70	100	66.67	72	50	88	77.1675	82.5837		1	2	1	0
罗铮	271	NMM	汉族	19	1.65	50	18.3655		<20	<24h	大学及以上	无	2	轻度	4	有					4		45	13		6							95	100	84	67	75	100	100	72	50	86.5	86.75	86.625		1	2	0	0
刘黎莎	276	NMM	汉族	21	1.64	65	24.1672	15-20岁	<20	<24h	大学及以上	无	2	轻度	10	有					-1		52	19		12							90	100	74	60	45	100	33.33	48	50	81	56.5825	68.7913		2	0	1	0
龚佩欣	279	NMM	汉族	20	1.65	52	19.1001	5-10岁	<20	<24h	大学及以上	无	2	轻度	13	有					9		57	18		14							95	50	64	30	55	100	66.67	52	50	59.75	68.4175	64.0837		2	3	2	0
王欣琳	288	NMM	汉族	20	1.57	47	19.0677	15-20岁	<20	<24h	大学及以上	无	5	中度	20	有					5		52	14		11							100	75	84	45	75	100	0	68	25	76	60.75	68.375		1	1	1	0
撒馨茹	290	NMM	其他	20	1.5	54	24	5-10岁	<20	<24h	大学及以上	无	5	轻度	1	无					11		52	16		12							95	100	84	50	40	100	0	64	75	82.25	51	66.625		0	0	0	0
唐铭蔓	293	NMM	汉族	19	1.68	54	19.1327	15-20岁	<20	<24h	大学及以上	无	5	中度	1	无					3		39	9		5							100	0	62	77	85	87.5	100	80	50	59.75	88.125	73.9375		0	0	0	0
周心悦	294	NMM	汉族	19	1.64	49	18.2183		<20	<24h	大学及以上	无	5	中度	3	有					10		53	20		12							95	75	74	47	70	100	66.67	64	25	72.75	75.1675	73.9587		0	1	1	0
方香	296	NMM	汉族	20	1.59	49	19.3821	15-20岁	<20	<24h	大学及以上	有	5	中度	3	无					3		62	13		3							95	0	84	52	70	100	0	80	25	57.75	62.5	60.125		1	0	1	0
任情	297	NMM	汉族	22	1.57	49	19.8791		<20	<24h	大学及以上	有	5	轻度	1	无					6		46	18		18							95	100	40	67	60	100	0	68	50	75.5	57	66.25		1	2	0	0
童书勤	298	NMM	汉族	21	1.58	47	18.8271	5-10岁	<20	<24h	大学及以上	无	3	轻度	4	有					4		41	7		7							100	100	84	45	80	100	100	80	75	82.25	90	86.125		1	2	0	0
刘玥璃	299	NMM	汉族	21	1.58	45	18.026	10-15岁	<20	<24h	大学及以上	无	2	轻度	4	无					2		46	4		12							100	75	90	85	75	100	100	88	50	87.5	90.75	89.125		0	1	0	0
吴思雅	303	NMM	汉族	19	1.64	49	18.2183	15-20岁	<20	<24h	大学及以上	无	2	轻度	1	无					3		45	6		5							90	100	80	87	70	100	100	76	25	89.25	86.5	87.875		1	1	1	0
宋春秀	311	NMM	汉族	19	1.68	48	17.0068	10-15岁	<20	24-72h	大学及以上	无	5	中度	0	无					7		55	23		7							100	50	74	47	45	87.5	0	60	25	67.75	48.125	57.9375		2	2	0	0
阳瑞鲜	312	NMM	汉族	19	1.6	61	23.8281	5-10岁	<20	<24h	大学及以上	无	5	中度	6	有					-1		63	18		15							100	100	74	90	70	100	0	32	50	91	50.5	70.75		1	0	1	1
秦苏云	315	NMM	汉族	20	1.6	46	17.9688		<20	<24h	大学及以上	无	5	中度	6	有					8		51	25		12							80	25	74	25	50	100	33.33	44	75	51	56.8325	53.9162		1	1	1	0
任顺越	317	NMM	其他	20	1.6	50	19.5312		<20	<24h	大学及以上	有	2	轻度	2	无					-1		44	10		10							100	100	90	77	70	75	100	52	50	91.75	74.25	83		0	1	0	0
王兴月	318	NMM	汉族	18	1.63		20.1525	10-15岁	<20	<24h	大学及以上	无	2	轻度	4	无					7		41	10		2							100	100	90	50	50	87.5	66.67	56	50	85	65.0425	75.0212		0	0	0	0
袁小婷	321	NMM	汉族	20	1.63	58	21.83	15-20岁	<20	<24h	大学及以上	有	5	中度	7	无					6		44	18		6							100	100	50	52	50	75	0	60	25	75.5	46.25	60.875		1	0	0	0
叶雯琳	322	NMM	汉族	19	1.56	50	20.5457	10-15岁	<20	<24h	大学及以上	无	5	中度	2	无					3		41	17									95	100	74	62	60	100	0	76	50	82.75	59	70.875		2	1	1	0
黄欣怡	324	NMM	汉族	19	1.56	60	24.6548		<20	<24h	大学及以上	有	2	轻度	1	有					4		36	11		6							95	100	74	47	75	100	100	72	25	79	86.75	82.875		1	1	1	0
袁小凤	327	NMM	汉族	19	1.6	47	18.3594	5-10岁	<20	<24h	大学及以上	有	2	轻度	2	有					6		55	22		19							95	75	80	67	70	75	100	60	75	79.25	76.25	77.75		1	1	1	1
吴嘉薇	332	NMM	汉族	21	1.63	52	19.5717		<20	<24h	大学及以上	无	8	重度	10	无					9		64	20		20							95	100	62	35	60	100	33.33	52	75	73	61.3325	67.1663		3	1	1	0
刘寒林	336	NMM	汉族	21	1.6	50	19.5312		<20	<24h	大学及以上	有	2	轻度	4	无					3		59	19		16							95	0	74	57	75	87.5	0	84	100	56.5	61.625	59.0625		2	2	1	0
陈胡静	339	NMM	汉族	20	1.56	43	17.6693	15-20岁	<20	<24h	大学及以上	无	3	轻度	1	有					2		47	3		0							100	100	90	82	85	100	100	80	50	93	91.25	92.125		1	1	1	0
袁菁	350	NMM	汉族	19	1.57	50	20.2848	15-20岁	<20	<24h	大学及以上	无	5	中度	3	无					11		53	11		5							100	100	84	72	55	100	100	52	50	89	76.75	82.875		2	2	1	1
黄彬	351	NMM	汉族	19	1.69	66	23.1084		<20	<24h	大学及以上	无	5	中度	3	有					2		54	11									95	100	74	82	65	100	100	80	50	87.75	86.25	87		0	0	1	0
杨淑月	352	NMM	汉族	19	1.73	58	19.3792	10-15岁	<20	<24h	大学及以上	有	5	中度	3	有					8		54	19									95	100	62	87	70	100	100	76	25	86	86.5	86.25		0	2	2	0
张玉	354	NMM	汉族	20	1.63	47	17.6898	15-20岁	<20	<24h	大学及以上	无	2	轻度	2	无					3		57	7		2							95	75	74	87	65	100	66.67	72	50	82.75	75.9175	79.3337		1	0	0	0
杨培	356	NMM	其他	20	1.58	57	22.8329		<20	<24h	大学及以上	有	5	中度	3	有					5		67	27									95	100	74	50	60	100	66.67	64	25	79.75	72.6675	76.2087		2	2	1	0
杨秦薇	357	NMM	汉族	19	1.55	45	18.7305	15-20岁	<20	<24h	大学及以上	无	2	轻度	4	无					4		56	14		14							95	100	74	67	75	100	66.67	80	75	84	80.4175	82.2087		1	1	0	0
陈婷	358	NMM	汉族	20	1.6	49	19.1406	5-10岁	<20	<24h	大学及以上	无	5	中度	1	无					10		65	26		17							85	25	74	62	75	87.5	0	64	25	61.5	56.625	59.0625		1	1	1	0
陈心悦	360	NMM	汉族	20	1.65	48	17.6309	10-15岁	<20	<24h	大学及以上	无	5	中度	5	无					6		59	11		10							95	100	84	87	55	100	33.33	56	50	91.5	61.0825	76.2913		0	0	0	0
何谦芊	369	NMM	汉族	20	1.68	49	17.3611	10-15岁	<20	<24h	大学及以上	无	5	中度	1	有					6		47	13		10							95	100	74	40	55	100	100	44	50	77.25	74.75	76		2	2	2	0
付雄珊	370	NMM	汉族	20	1.68	60	21.2585		<20	<24h	大学及以上	无	2	轻度	1	无					7		48	15		9							95	75	62	45	80	87.5	66.67	68	25	69.25	75.5425	72.3962		0	0	0	0
陈梦莲	374	NMM	汉族	19	1.6	53	20.7031		<20	<24h	大学及以上	无	2	轻度	4	有					2		60	20		8							95	75	90	35	65	100	66.67	68	75	73.75	74.9175	74.3337		2	3	2	0
白奥霜	377	NMM	汉族	19	1.55	53	22.0604		<20	>72h	大学及以上	无	2	轻度	2	无					5		45	7		9							95	100	84	92	40	100	33.33	52	25	92.75	56.3325	74.5413		1	1	1	0
李萱苗	381	NMM	汉族	23	1.66	54	19.5965	15-20岁	<20	<24h	大学及以上	有	8	重度	1	有					2		55	13		1							100	100	100	62	75	100	66.67	84	50	90.5	81.4175	85.9587		1	0	1	1
刘小莉	384	NMM	汉族	20	1.55	55	22.8928	15-20岁	<20	<24h	大学及以上	无	5	中度	4	有					2		52	16		4							100	100	74	55	69	100	100	68	50	82.25	84.25	83.25		1	1	0	0
刘苑梅	388	NMM	汉族	20	1.54	51	21.5045	15-20岁	<20	<24h	大学及以上	无	5	中度	1	无					11			22		16							90	25	74	45	60	100	0	56	25	58.5	54	56.25		1	2	1	0
唐宗腾	392	NMM	汉族	23	1.52	42	18.1787	15-20岁	<20	24-72h	大学及以上	无	8	重度	4	无					6			4		3							90	75	90	52	75	100	33.33	64	25	76.75	68.0825	72.4163		1	1	2	1
梁琴	395	NMM	汉族	19	1.62	54	20.5761	15-20岁	<20	<24h	大学及以上	无	5	中度	2	无					9		53	25		14							95	100	41	50	45	100	0	60	50	71.5	51.25	61.375		2	1	1	0
张玉娟	396	NMM	汉族	21	1.58	47	18.8271	15-20岁	<20	<24h	大学及以上	无	6	中度	6	无					12		67	21		19							85	0	62	35	50	75	0	40	75	45.5	41.25	43.375		1	2	2	0
冯宛如	397	NMM	汉族	25	1.58	45	18.026	10-15岁	<20	<24h	大学及以上	无	5	中度	2	有					7			2		0							85	100	74	47	80	100	66.67	60	50	76.5	76.6675	76.5837		1	1	0	0
黄敏	398	NMM	汉族	22	1.58	50	20.0288	5-10岁	<20	<24h	大学及以上	无	5	中度	2	无					5			2		1							100	100	90	82	80	100	100	84	50	93	91	92		1	1	2	0
杨盛晴	407	NMM	汉族	18	1.62	43	16.3847	10-15岁	<20	<24h	大学及以上	无	6	中度	5	无					5		49	11		14							95	75	62	67	70	100	100	72	75	74.75	85.5	80.125		2	1		0
欧菊	412	NMM	汉族	21	1.5	47	20.8889	15-20岁	<20	<24h	大学及以上	有	2	轻度	1	无					6		60	10		7							95	100	74	70	75	100	66.67	68	75	84.75	77.4175	81.0837		2	1	1	0
任艳林	415	NMM	汉族	18	1.7	50	17.301	15-20岁	<20	<24h	大学及以上	无	2	轻度	3	无					9		55	9		6							75	0	22	65	40	75	0	56	75	40.5	42.75	41.625		2	0	1	0
江秋伊	417	NMM	汉族	19	1.7	60	20.7612	15-20岁	<20	<24h	大学及以上	无	5	中度	8	无					19		60	20		9							100	100	74	35	25	25	0	32	25	77.25	20.5	48.875		2	1	2	0
燕凯丽	427	NMM	汉族	20	1.7	55	19.0311	15-20岁	<20	24-72h	大学及以上	无	5	中度	8	有					5		63	6		4							95	100	90	87	65	100	100	76	25	93	85.25	89.125		1	0	1	0
陈鑫	429	NMM	汉族	20	1.63	52	19.5717	15-20岁	<20	<24h	大学及以上	无	5	中度	0	无					11		65	6		9							95	75	84	42	65	100	33.33	72	25	74	67.5825	70.7913		2	2	2	0
ji焱丽	430	NMM	汉族	19	1.62	41	15.6226	15-20岁	<20	<24h	大学及以上	有	5	中度	0	无					7		64	5		7							65	50	42	47	75	100	33.33	44	75	51	63.0825	57.0412		0	0	0	0
李露	433	NMM	汉族	18	1.6	50	19.5312	15-20岁	<20	<24h	大学及以上	无	5	中度	5	无					11		50	11		7							95	100	84	65	65	100	100	52	50	86	79.25	82.625		1	2	2	1
邓婧	435	NMM	汉族	20	1.54	41	17.2879		<20	<24h	大学及以上	无	2	轻度	0	无					9		48	16		8							100	50	62	55	85	100	0	56	50	66.75	60.25	63.5		1	1	1	0
沈若男	436	NMM	汉族	20	1.63	56	21.0772	10-15岁	<20	<24h	大学及以上	无	4	中度	1	有					2		67	2		1							95	100	90	50	65	100	66.67	76	50	83.75	76.9175	80.3337		1	2	0	0
彭芹慧	437	NMM	其他	20	1.55	44	18.3143	15-20岁	<20	<24h	大学及以上	无	6	中度	3	无					11		63	9		3							80	100	80	47	60	87.5	0	56	25	76.75	50.875	63.8125		1	1	2	0
宁倩文	438	NMM	汉族	20	1.66	54	19.5965	10-15岁	<20	<24h	大学及以上	无	2	轻度	2	有					2		51	7		6							95	50	84	55	80	100	0	68	50	71	62	66.5		1	1	1	0
林静	440	NMM	汉族	20	1.56	47	19.313	15-20岁	<20	<24h	大学及以上	无	8	重度	6	有					4		78	5		10							95	100	72	50	80	100	66.67	76	50	79.25	80.6675	79.9587		3	2	2	3
刘曼媛	451	NMM	汉族	19	1.61	66	25.462	15-20岁	<20	<24h	大学及以上	无	2	轻度	3	无					-1		50	9		5							100	0	84	77	85	100	33.33	72	75	65.25	72.5825	68.9163		2	1	1	0
周红	453	NMM	汉族	18	1.58	49	19.6283	10-15岁	<20	<24h	大学及以上	无	5	中度	3	有					7		55	8		13							95	100	72	62	80	100	66.67	88	100	82.25	83.6675	82.9587		0	0	2	0
张灏霖	455	NMM	汉族	18	1.56	64	26.2985		<20	<24h	大学及以上	有	2	轻度	4	有					16		62	29		17							95	50	84	40	35	100	33.33	40	75	67.25	52.0825	59.6662		2	3	2	0
冯敏	459	NMM	汉族	19	1.67	56	20.0796	15-20岁	<20	<24h	大学及以上	无	2	轻度	4	有							49	5		3							95	100	90	57	65	100	100	56	75	85.5	80.25	82.875		1	2	1	0
严秋月	460	NMM	汉族	20	1.75	55	17.9592	10-15岁	<20	<24h	大学及以上	无	4	中度	0	无					7		57	9		9							100	75	74	62	70	100	0	60	25	77.75	57.5	67.625		0	0	0	0
甘琳	463	NMM	汉族	20	1.63	48	18.0662	10-15岁	<20	<24h	大学及以上	无	7	重度	2	有					17		64	26		22							100	50	74	52	20	87.5	0	28	25	69	33.875	51.4375		1	2	0	0
熊静	464	NMM	汉族	19	1.55	42	17.4818	10-15岁	<20	<24h	大学及以上	无	6	中度	3	有					4		49	9		10							95	100	74	72	85	100	66.67	68	50	85.25	79.9175	82.5837		1	1	0	0
祝阿只	468	NMM	其他	21	1.66	48	17.4191	15-20岁	<20	<24h	大学及以上	无	4	轻度	2	有					9		42	19		11							95	100	90	62	45	100	66.67	40	75	86.75	62.9175	74.8337		1	2	1	0
闻秀英	469	NMM	汉族	20	1.58	46	18.4265	5-10岁	<20	<24h	大学及以上	有	2	轻度	4	无					10		51	24		27							75	50	62	10	50	62.5	0	40	0	49.25	38.125	43.6875		2	3	1	0
顾曦	474	NMM	汉族	19	1.61	45	17.3604	5-10岁	<20	<24h	大学及以上	无	5	中度	2	有					10		63	12		9							90	0	62	87	40	100	0	40	50	59.75	45	52.375		3	3	2	2
潘玉婷	475	NMM	汉族	19	1.52	40	17.313	10-15岁	<20	<24h	大学及以上	无	5	中度	2	有					13		67	12		7							65	0	84	92	65	100	0	64	75	60.25	57.25	58.75		1	1	0	0
胡思雨	477	NMM	汉族	19	1.62	59	22.4813	15-20岁	<20	<24h	大学及以上	无	2	轻度	1	有					10		45	22		12							100	0	84	45	40	100	0	56	50	57.25	49	53.125		1	1	1	0
王梅	482	NMM	汉族	19	1.6	43	16.7969	15-20岁	<20	<24h	大学及以上	无	6	中度	20	无					5		65	10		17							95	25	74	35	55	87.5	33.33	48	25	57.25	55.9575	56.6037		2	0	2	0
皮特甲古莫	483	NMM	其他	22	1.5	45	20	15-20岁	<20	<24h	大学及以上	无	5	中度	0	无					10		49	13		9							90	25	80	62	55	100	0	48	50	64.25	50.75	57.5		2	1	1	0
马学花	484	NMM	其他	23	1.6	45	17.5781		<20	<24h	大学及以上	无	5	中度	4	无					13		66	30		22							85	50	64	62	60	100	33.33	56	50	65.25	62.3325	63.7912		2	2	2	1
李思莹	486	NMM	汉族	19	1.65	57	20.9366		<20	<24h	大学及以上	无	5	中度	12	有					11		67	20		13							95	75	74	25	35	87.5	0	32	50	67.25	38.625	52.9375		1	1	0	1
莫小彤	487	NMM	汉族	21	1.62	60	22.8624	10-15岁	<20	24-72h	大学及以上	有	4	中度	1	无					8		62	4		3							95	50	90	82	35	100	66.67	60	25	79.25	65.4175	72.3337		1	0	1	0
刘丽丹	495	NMM	汉族	18	1.55	42	17.4818	15-20岁	<20	<24h	大学及以上	无	5	中度	4	无					3		47	7		5							100	100	84	92	80	100	100	84	75	94	91	92.5		0	1	0	0
谭慧	496	NMM	汉族	19	1.63	53	19.9481	10-15岁	<20	<24h	大学及以上	无	2	轻度	4	无					11		49	15		11							75	25	74	82	50	100	0	52	100	64	50.5	57.25		1	1	1	0
彭雪	502	NMM	汉族	20	1.53	43	18.369		<20	<24h	大学及以上	无	2	轻度	6	无					18		66	44		35							70	0	62	25	20	87.5	0	28	25	39.25	33.875	36.5625		2	2	1	0
尹姝	506	NMM	汉族	20	1.58	48	19.2277	10-15岁	<20	<24h	大学及以上	无	2	轻度	0	无					13		60	20		15							85	100	84	60	40	100	0	48	50	82.25	47	64.625		2	1	1	0
何佩霈	507	NMM	汉族	18	1.63	53	19.9481		<20	<24h	大学及以上	无		中度	4	无					0		40	4		2							95	75	84	72	85	100	66.67	76	50	81.5	81.9175	81.7087		0	0	0	0
刘佳	508	NMM	汉族	18	1.62	53	20.1951	15-20岁	<20	<24h	大学及以上	无	4	中度	2	无					3		49	8		5							85	75	74	67	70	100	0	72	50	75.25	60.5	67.875		0	0	0	0
成畯瑶	509	NMM	汉族	21	1.55	43	17.898		<20	<24h	大学及以上	无	2	轻度	2	无					7		54	15		18							85	75	32	45	55	100	100	80	75	59.25	83.75	71.5		2	1	1	0
曾丽雯	510	NMM	汉族	21	1.59	54	21.3599		<20	<24h	大学及以上	无	4	中度	0	无					13			29		10							95	100	74	72	75	100	0	80	50	85.25	63.75	74.5		1	2	1	0
王琦婧	511	NMM	汉族	19	1.63	60	22.5827	5-10岁	<20	<24h	大学及以上	无	5	中度	7	有					6		61	8		4							95	100	84	87	90	100	100	76	25	91.5	91.5	91.5		1	1	0	0
段淑涵	515	NMM	汉族	19	1.56	51	20.9566	5-10岁	<20	<24h	大学及以上	无	6	中度	1	有					6		61	16		9							100	75	42	50	45	62.5	33.33	48	25	66.75	47.2075	56.9787		0	0	0	0
杨婷	520	NMM	汉族	18	1.6	48	18.75	15-20岁	<20	<24h	大学及以上	无	4	中度	2	无					10		54	9		18							95	100	90	62	60	100	33.33	60	75	86.75	63.3325	75.0413		1	1	1	0
胡佳	526	NMM	汉族	19	1.62	52	19.8141	10-15岁	<20	<24h	大学及以上	无	3	轻度	2	有					7		62	11		3							95	100	84	55	55	100	33.33	68	50	83.5	64.0825	73.7913		1	1	1	0
杨丹妮	530	NMM	汉族	21.95	1.58	45.5	18.2262	10-15岁	<20	<24h	大学及以上	无	3	轻度	5	无					6		58	22		16							100	100	40	52	55	100	33.33	56	100	73	61.0825	67.0413		1	1	0	0
雷麟	539	NMM	汉族	18	1.51	45	19.736		<20	<24h	大学及以上	有	2	轻度	1	有					5		45	11		10							85	100	90	55	50	100	33.33	72	50	82.5	63.8325	73.1663		0	1	1	0
杨立秋	540	NMM	汉族	19	1.6	43	16.7969	15-20岁	<20	<24h	大学及以上	无	2	轻度	0	有					4		51	9		8							90	100	74	62	45	100	0	60	100	81.5	51.25	66.375		1	0	0	0
黄冰清	549	NMM	汉族	18	1.65	52	19.1001	10-15岁	<20	<24h	大学及以上	无	2	轻度	3	有					1		45	2		0							95	100	90	95	80	100	100	80	50	95	90	92.5		0	0	0	0
王艳	550	NMM	汉族	20	1.63	52	19.5717	15-20岁	<20	<24h	大学及以上	无	2	轻度	10	有					6		64	16		15							95	0	84	40	60	100	0	64	25	54.75	56	55.375		3	0	1	0
何婷	555	NMM	汉族	20	1.59	55	21.7555	15-20岁	<20	<24h	大学及以上	无	5	中度	0	无					3		58	6		23							95	0	80	57	50	87.5	33.33	56	50	58	56.7075	57.3537		1	2	0	0
张国会	559	NMM	其他	21	1.65	49	17.9982	15-20岁	<20	<24h	大学及以上	无	4	中度	1	无					6		62	17		12							100	75	74	57	65	100	33.33	64	50	76.5	65.5825	71.0413		2	1	1	0
陈渝尹	562	NMM	其他	20			20.1525	15-20岁	<20	<24h	大学及以上	无	3	轻度	10	无					6		59	6		20							95	100	84	65	65	100	100	68	25	86	83.25	84.625		1	3	0	0
梁蜜儿	569	NMM	汉族	18	1.62	57	21.7193	5-10岁	<20	<24h	大学及以上	无	2	轻度	1	无					12		60	12		9							95	100	84	57	35	100	0	36	50	84	42.75	63.375		1	2	0	0
吴敏	571	NMM	汉族	20	1.6	42	16.4062	10-15岁	<20	<24h	大学及以上	无	2	轻度	1	无					7		53	19		9							75	25	74	55	55	87.5	66.67	64	25	57.25	68.2925	62.7713		2	3	1	2
赵燚涵	572	NMM	汉族	18	1.62	51	19.433	5-10岁	<20	<24h	大学及以上	无	2	轻度	1	无					2		49	10		4							95	100	74	72	70	100	33.33	60	50	85.25	65.8325	75.5413		1	1	1	0
陈丹	575	NMM	汉族	19	1.55	44	18.3143	15-20岁	<20	<24h	大学及以上	无	2	轻度	7	无					12		66	19		13							75	0	64	60	35	75	0	44	50	49.75	38.5	44.125		2	2	1	1
刘梦玉	581	NMM	汉族	20			20.1525		<20	<24h	大学及以上	无	5	中度	4	有					4		60	19		11							90	0	84	82	75	100	0	76	25	64	62.75	63.375		1	2	1	0
刘纯言	582	NMM	汉族	19	1.76	65	20.984	15-20岁	<20	<24h	大学及以上	无	5	中度	3	有					2		53	9		8							75	25	74	55	60	100	66.67	72	75	57.25	74.6675	65.9587		1	0	1	0
郑小玉	591	NMM	汉族	20	1.62	65	24.7676	10-15岁	<20	>72h	大学及以上	无	5	中度	2	无					15		43	28		30							65	0	84	47	20	50	0	44	25	49	28.5	38.75		3	3	2	0
谭钦悦	592	NMM	汉族	20	1.63	44	16.5607	10-15岁	<20	<24h	大学及以上	无	5	中度	3	有					10		59	15		13							70	0	74	35	40	100	0	56	25	44.75	49	46.875		2	3	0	2
杨燕	593	NMM	汉族	21	1.64	58	21.5645		<20	<24h	大学及以上	有	5	中度	1	无					10		63	10		2							100	100	74	77	65	100	0	60	50	87.75	56.25	72		1	3	1	1
何洁	594	NMM	汉族	19	1.58	47	18.8271		<20	<24h	大学及以上	无	2	轻度	2	无					6		53	14		8							95	0	74	62	60	100	66.67	76	100	57.75	75.6675	66.7087		1	1	0	0
常慈英	596	NMM	汉族	19	1.58	46	18.4265	10-15岁	<20	<24h	大学及以上	无	2	轻度	4	无					3		43	6		8							100	100	64	52	50	100	100	68	50	79	79.5	79.25		2	3	1	0
施秋霞	597	NMM	汉族	21	1.56	53.5	21.9839	15-20岁	<20	<24h	大学及以上	无	2	轻度	5	有					10		53	10		6							95	100	74	35	50	87.5	0	56	50	76	48.375	62.1875		2	1	0	0
王静霞	599	NMM	汉族	19	1.58	46	18.4265	15-20岁	<20	<24h	大学及以上	无		中度	1	有					10		45	13		6							100	100	84	50	35	87.5	66.67	60	75	83.5	62.2925	72.8962		2	0	2	0
王瑞	603	NMM	汉族	19	1.62	54	20.5761	10-15岁	<20	<24h	大学及以上	无	2	轻度	1	有					5		53	13		11							90	100	84	35	75	100	66.67	64	75	77.25	76.4175	76.8337		2	1	0	0
杨鑫	604	NMM	汉族	20	1.55	46	19.1467		<20	<24h	大学及以上	无	5	中度	1	有					5		40	0		5							90	50	90	57	70	100	100	60	50	71.75	82.5	77.125		0	0	0	0
贾锘然	615	NMM	汉族	21	1.6	51	19.9219		<20	<24h	大学及以上	无	5	中度	4	有					5		51	7		6							100	100	62	72	70	100	66.67	72	50	83.5	77.1675	80.3337		2	1	2	0
文诸漫	616	NMM	汉族	20	1.63	47	17.6898		<20	<24h	大学及以上	无	5	中度	6	有					10		52	18		16							95	25	30	60	50	75	33.33	36	75	52.5	48.5825	50.5412		2	3	1	0
钟苑平	617	NMM	汉族	19	1.63	62	23.3355	10-15岁	<20	24-72h	大学及以上	无	5	中度	3	有					14		62	14		9							95	25	52	40	60	100	0	48	25	53	52	52.5		2	1	1	0
邹福明	618	NMM	其他	20	1.62		20.1525	10-15岁	<20	24-72h	大学及以上	无	2	轻度	1	有					4		56	10		2							100	100	74	77	65	100	33.33	72	50	87.75	67.5825	77.6663		1	1	0	1
杜真艳	620	NMM	其他	21	1.58	56	22.4323	15-20岁	<20	<24h	大学及以上	无	5	中度	4	有					7		55	29		5							95	100	90	65	50	100	100	48	50	87.5	74.5	81		1	2	1	1
赖娟	627	NMM	汉族	21	1.61	60	23.1473		<20	<24h	大学及以上	无	2	轻度	1	有					11		55	14		14							95	0	90	40	35	100	0	48	25	56.25	45.75	51		2	1	1	0
何雨谦	628	NMM	汉族	19	1.56	47	19.313	15-20岁	<20	<24h	大学及以上	无	4	中度	4	有					13		63	33		14							100	50	62	45	35	100	0	28	50	64.25	40.75	52.5		1	0	2	0
郑心怡	634	NMM	汉族	20	1.65	50	18.3655		<20	<24h	大学及以上	有	2	轻度	3	有					9		52	18		10							75	100	74	60	40	100	33.33	44	25	77.25	54.3325	65.7913		1	1	0	0
徐慧姣	635	NMM	汉族	20	1.63	56	21.0772	15-20岁	<20	<24h	大学及以上	无	2	轻度	9	有					4		42	10		6							95	100	74	72	70	100	66.67	84	50	85.25	80.1675	82.7087		1	0	1	0
刘燕	636	NMM	汉族	20	1.62	48	18.2899	15-20岁	<20	<24h	大学及以上	无	2	轻度	2	有					-2		48	10		6							100	100	84	67	70	100	100	64	75	87.75	83.5	85.625		1	3	0	0
杨晓妹	638	NMM	汉族	21	1.6	55	21.4844	15-20岁	<20	<24h	大学及以上	无	2	轻度	1	有					15		50	25		31							100	50	62	40	25	100	0	68	50	63	48.25	55.625		2	3	2	1
赖方汶	642	NMM	汉族	19	1.68	50	17.7154	10-15岁	<20	<24h	大学及以上	无	2	轻度	2	有					4		60	15		8							100	100	74	77	50	100	33.33	60	25	87.75	60.8325	74.2913		2	3	2	1
陈芳	643	NMM	汉族	19	1.6	42.5	16.6016	15-20岁	<20	<24h	大学及以上	无	5	中度	1	有					10		38	14		2							85	100	90	55	65	100	0	44	75	82.5	52.25	67.375		1	2	1	0
李唯维	645	NMM	汉族	19	1.61	68	26.2336	15-20岁	<20	<24h	大学及以上	无	2	轻度	1	有					4		47	6		4							90	100	90	55	60	100	66.67	68	50	83.75	73.6675	78.7087		0	0	1	0
张涵	646	NMM	汉族	18	1.58	58	23.2335	15-20岁	<20	<24h	大学及以上	无	3	轻度	6	有					8		60	6		11							85	50	84	52	70	100	0	76	75	67.75	61.5	64.625		1	1	2	0
安文颖	648	NMM	汉族	21	1.55	55	22.8928		<20	<24h	大学及以上	无	2	轻度	4	有					13		36	6		5							100	100	62	20	40	87.5	0	32	25	70.5	39.875	55.1875		2	2	1	1
郭睿	649	NMM	其他	20	1.6	52.5	20.5078	15-20岁	<20	<24h	大学及以上	无	2	轻度	3	有					7		52	8		10							85	50	62	45	65	62.5	0	68	75	60.5	48.875	54.6875		2	3	1	0
李月	651	NMM	汉族	19	1.68	54	19.1327	15-20岁	<20	<24h	大学及以上	有	6	中度	1	有					13		64	9		14							95	100	90	82	65	100	33.33	44	100	91.75	60.5825	76.1663		1	3	2	1
张婉静	653	NMM	汉族	20	1.63	50	18.8189	15-20岁	<20	<24h	大学及以上	无	4	中度	22	有					10		66	14		22							65	25	74	72	55	87.5	0	44	75	59	46.625	52.8125		1	3	0
何雪	654	NMM	汉族	20	1.6	44	17.1875	15-20岁	<20	<24h	大学及以上	有	7	重度	2	有					6		70	12		16							95	0	84	62	70	100	66.67	76	25	60.25	78.1675	69.2087		1	1	1	0
唐莎莎	655	NMM	汉族	19	1.64	50	18.5901	15-20岁	<20	<24h	大学及以上	有	2	轻度	18	有					13		67	5		4							95	100	80	57	55	75	100	64	25	83	73.5	78.25		3	3	2	1
赖艳霞	660	NMM	汉族	20	1.57	45	18.2563	15-20岁	<20	<24h	大学及以上	无	8	重度	3	有					7		70	7		8							85	25	74	20	70	87.5	0	56	25	51	53.375	52.1875		2	2	1	1
苏朝霞	666	NMM	汉族	19	1.66	51	18.5078	15-20岁	<20	<24h	大学及以上	有	2	轻度	4	有					18		75	22		22							95	50	22	35	45	100	0	52	75	50.5	49.25	49.875		2	3	1	2
邓艾佳	670	NMM	汉族	20	1.64	55	20.4491	15-20岁	<20	<24h	大学及以上	无	2	轻度	5	有					3		51	11		3							100	25	74	67	70	87.5	33.33	68	50	66.5	64.7075	65.6038		1	1	1	1
杨怡	673	NMM	汉族	20	1.62	47	17.9089	10-15岁	<20	<24h	大学及以上	无	5	中度	1	有					4		62	9		3							100	100	74	97	75	100	100	88	50	92.75	90.75	91.75		1	2	1	0
冯玉莲	675	NMM	汉族	20	1.56	44	18.0802		<20	<24h	大学及以上	有	5	中度	3	有					7		51	9		5							80	25	70	87	50	62.5	0	72	50	65.5	46.125	55.8125		0	0	0	0
唐海吹	679	NMM	汉族	18	1.63	45	16.937		<20	<24h	大学及以上	无	2	轻度	5	有					7		61	10		10							95	75	74	67	55	100	0	56	60	77.75	52.75	65.25		1	1	0	0
黄琦琦	682	NMM	汉族	21	1.56	45	18.4911	15-20岁	<20	<24h	大学及以上	无	5	中度	4	有					15		42	18		19							95	50	22	45	40	87.5	0	40	75	53	41.875	47.4375		2	2	1	0
杨越	687	NMM	汉族	19	1.63	51	19.1953	5-10岁	<20	<24h	大学及以上	无	5	中度	1	无					1		49	0		4							95	100	84	82	75	100	100	88	75	90.25	90.75	90.5		0	0	0	0
黄鑫	692	NMM	汉族	19	1.59	60	23.7332	15-20岁	<20	<24h	大学及以上	无	5	中度	1	有					10		57	5		2							85	100	74	67	65	100	0	68	50	81.5	58.25	69.875		1	2	0	0
曹晓菊	698	NMM	汉族	19	1.59	56	22.151	15-20岁	<20	<24h	大学及以上	无	5	中度	1	有					5		73	5		15							100	100	90	72	85	100	0	80	100	90.5	66.25	78.375		1	3	1	0
张雨萌	700	NMM	汉族	18	1.55	53	22.0604		<20	<24h	大学及以上	无	5	中度	8	有					11		59	13		5							85	100	74	82	55	100	100	80	50	85.25	83.75	84.5		1	0	0	0
喻佳文	705	NMM	汉族	19	1.68	59	20.9042	15-20岁	<20	<24h	大学及以上	无	2	轻度	1	有					5		40	14		4							95	100	84	67	75	100	66.67	84	50	86.5	81.4175	83.9587		2	2	2	0
唐琳	707	NMM	汉族	18			20.1525		<20	<24h	大学及以上	无	2	轻度	4	有					-2		49	9		3							100	100	84	77	80	100	100	80	50	90.25	90	90.125		1	1	1	0
邓婷	709	NMM	汉族	18	1.49		20.1525	15-20岁	<20	<24h	大学及以上	有	5	中度	3	有					18		59	3		14							85	100	84	62	80	100	100	60	50	82.75	85	83.875		2	0	2	0
但荟娇	711	NMM	汉族	18	1.6	50	19.5312	10-15岁	<20	<24h	大学及以上	无	3	轻度	1	有					4		61	8		6							100	75	84	77	65	100	100	64	50	84	82.25	83.125		1	0	1	0
李欣澄	717	NMM	汉族	19	1.62	48	18.2899	15-20岁	<20	<24h	大学及以上	无	1	轻度	3	有					2		47	3		6							95	100	90	67	85	100	66.67	80	50	88	82.9175	85.4587		1	0	1	0
王昱心	718	NMM	汉族	18	1.64	50	18.5901		<20	<24h	大学及以上	无	2	轻度	1	有					0		55	3		1							95	100	74	67	80	100	100	92	50	84	93	88.5		1	0	1	0
杨雅岚	719	NMM	汉族	17	1.62	42	16.0037		<20	<24h	大学及以上	无	4	中度	1	有					-2		45	0		2							95	100	90	77	85	100	100	72	100	90.5	89.25	89.875		0	0	0	0
邱诗洋	720	NMM	汉族	18	1.55	48	19.9792	15-20岁	<20	<24h	大学及以上	无		中度	3	无					6		55	4		14							85	100	74	50	60	87.5	33.33	60	75	77.25	60.2075	68.7288		1	2	1	0
刘妍伶	728	NMM	汉族	18	1.6	44	17.1875	10-15岁	<20	<24h	大学及以上	无	5	中度	10	无					10		63	2		12							95	75	74	52	60	100	66.67	60	50	74	71.6675	72.8337		1	3	1	1
邹子怡	730	NMM	汉族	19	1.72	53	17.9151	15-20岁	<20	<24h	大学及以上	无	5	中度	10	无					10		64	11		12							80	100	62	92	80	100	100	60	50	83.5	85	84.25		2	2	2	0
张秀萍	731	NMM	汉族	17	1.55	48	19.9792	15-20岁	<20	<24h	大学及以上	无	3	轻度	1	无					9		50	4		22							95	100	84	62	75	100	66.67	52	75	85.25	73.4175	79.3337		1	0	1	1
孙丙	732	NMM	其他	18	1.62	60	22.8624		<20	<24h	大学及以上	无	6	中度	1	无					6		49	5		17							95	75	90	55	70	100	100	52	50	78.75	80.5	79.625		1	3	2	3
李双秀	738	NMM	汉族	18	1.62	52	19.8141	15-20岁	<20	<24h	大学及以上	无	2	轻度	4	无					2		43	7		4							100	100	84	45	65	100	33.33	68	50	82.25	66.5825	74.4163		0	0	2	0
李韵童	740	NMM	汉族	18			20.1525	15-20岁	<20	<24h	大学及以上	无	2	轻度	4	有					7		47	7		2							95	75	74	65	70	100	100	80	50	77.25	87.5	82.375		0	0	1	0
付凤迪	743	NMM	汉族	19	1.55	44	18.3143	15-20岁	<20	<24h	大学及以上	无	2	轻度	1	有					10		40	10		16							90	75	62	67	70	100	0	56	50	73.5	56.5	65		1	1	2	0
徐海惹	748	NMM	汉族	18	1.65	67	24.6097	15	<20	<24h	大学及以上	有	5	中度	8	有					9		46	27		14							90	100	84	35	35	100	100	24	50	77.25	64.75	71		1	0	0	0
李梅	749	NMM	其他	18	1.6	65	25.3906		<20	<24h	大学及以上	无	5	中度	4	无					5		62	28		1							100	75	74	77	50	100	66.67	52	50	81.5	67.1675	74.3337		1	2	2	1
范远慧	755	NMM	汉族	19	1.57	60	24.3418	15-20岁	<20	<24h	大学及以上	无	4	中度	1	有					6		47	7									100	50	84	55	70	100	66.67	68	50	72.25	76.1675	74.2087		1	1	0	0
蔡心玥	756	NMM	汉族	18	1.63	55	20.7008		<20	<24h	大学及以上	无	3	轻度	4	无					2		45	12									75	100	62	67	35	100	100	84	50	76	79.75	77.875		1	1	0	0
李文怡	758	NMM	汉族	18	1.65	50	18.3655		<20	<24h	大学及以上	无	2	轻度	2	有					6		40	11									95	100	90	50	70	100	100	60	50	83.75	82.5	83.125		1	1	2	1
张爽	761	NMM	其他	18	1.6	52.5	20.5078		<20	<24h	大学及以上	有	5	中度	2	有					4		66	11		14							90	100	74	72	55	100	0	76	75	84	57.75	70.875		1	1	2	1
王怡	763	NMM	汉族	18	1.57	47.5	19.2706		<20	<24h	大学及以上	无		中度	4	无					3		63	5		4							45	0	74	60	55	100	0	72	50	44.75	56.75	50.75		1	1	1	0
仁青拉初	769	NMM	其他	20	1.67	69	24.7409	10-15岁	<20	<24h	大学及以上	无	5	中度	1	无					7		48	6		1							100	100	90	62	50	100	66.67	60	75	88	69.1675	78.5837		1	1	1	0
马建英	770	NMM	其他	18			20.1525	15-20岁	<20	24-72h	大学及以上	无	6	中度	2	无					0		69	14		3							100	100	74	72	65	100	66.67	64	50	86.5	73.9175	80.2087		1	1	0	0
唐佳琪	777	NMM	汉族	20	1.5	49	21.7778	10-15岁	<20	<24h	大学及以上	无	3	轻度	2	有					16		49	18		13							100	100	80	57	40	100	33.33	60	50	84.25	58.3325	71.2913		2	2	2	0
曾子珈	781	NMM	汉族	18	1.62	59	22.4813		<20	<24h	大学及以上	无		轻度	13	无					10		57	21		7							100	100	74	77	45	100	0	48	25	87.75	48.25	68		1	1	2	0
刘宏	782	NMM	汉族	18	1.6	59	23.0469		<20	<24h	大学及以上	无	2	轻度	4	有					14		46	18		6							85	100	84	62	60	100	33.33	52	50	82.75	61.3325	72.0413		1	2	1	0
杨晗	785	NMM	汉族	19			20.1525		<20	<24h	大学及以上	无	2	轻度	1	有					18		43	9		7							75	50	74	15	45	100	0	36	50	53.5	45.25	49.375		1	1	2	0
杨爽	789	NMM	汉族	17	1.61	48.5	18.7107		<20	<24h	大学及以上	无	5	中度	3	有					10		54	0		15							80	25	62	72	40	100	33.33	76	0	59.75	62.3325	61.0412		2	2	1	0
胡渝	790	NMM	汉族	19	1.59	50	19.7777	15-20岁	<20	<24h	大学及以上	有	2	轻度	4	有					6		58	12		5							95	100	74	57	50	75	0	40	100	81.5	41.25	61.375		0	0	2	0
金琳	793	NMM	汉族	18	1.56	58	23.833		<20	<24h	大学及以上	无		中度	4	有					7		63	12		7							95	75	84	50	65	100	33.33	52	50	76	62.5825	69.2913		1	0	2	0
刘玉婷	794	NMM	汉族	19	1.6	55	21.4844		<20	<24h	大学及以上	无	3	中度	4	有					10		52	19		18							95	75	84	55	50	100	33.33	48	50	77.25	57.8325	67.5413		2	2	1	0
杜芯怡	795	NMM	汉族	18	1.65	49.5	18.1818		<20	<24h	大学及以上	无	5	中度	3	有					6		67	8		13							90	50	74	60	50	87.5	66.67	52	50	68.5	64.0425	66.2712		2	2	2	0
汪鳞汶	797	NMM	汉族	18	1.62	55	20.9572		<20	<24h	大学及以上	无	2	轻度	2	有					5		47	11		11							100	50	84	77	70	100	0	72	100	77.75	60.5	69.125		1	1	2	0
秦朗	800	NMM	汉族	17	1.58	57	22.8329	10-15岁	<20	<24h	大学及以上	无	5	中度	6	有					14		48	31		13							80	0	84	40	20	62.5	0	20	80	51	25.625	38.3125		2	2	2	0
钟雨柔	811	NMM	汉族	18	1.63	58	21.83	10-15岁	<20	<24h	大学及以上	无		中度	6	无					6		46	9		1							95	100	90	50	60	100	100	60	95	83.75	80	81.875		1	1	0	0
肖菁	813	NMM	汉族	20	1.66	56	20.3223	44484	<20	<24h	大学及以上	无		中度	1	有					18		59	13		12							95	75	84	30	40	100	66.67	48	95	71	63.6675	67.3337		3	3	3	3
袁玥	822	NMM	汉族	18	1.66	55	19.9594	15-20岁	<20	<24h	大学及以上	无	4	中度	1	无					3		45	6		2							100	100	84	92	80	100	66.67	80	100	94	81.6675	87.8337		1	0	1	0
刘思潼	825	NMM	汉族	18	1.63	52	19.5717		<20	<24h	大学及以上	无	2	轻度	3	无					7		46	9		9							100	25	74	60	70	100	33.33	68	100	64.75	67.8325	66.2913		3	2	3	3
代红兴	827	NMM	汉族	18	1.6	45	17.5781	15-20岁	<20	<24h	大学及以上	无	5	中度	5	有					0		51	4		5							95	100	84	77	75	100	100	76	95	89	87.75	88.375		1	0	2	0
青益柔	832	NMM	汉族	18	1.6	60	23.4375	5-10岁	<20	<24h	大学及以上	无	2	轻度	1	无								8		6							100	100	90	65	60	100	100	76	25	88.75	84	86.375		0	0	0	0
岑禧	841	NMM	汉族	19	1.68	54	19.1327	5-10岁	<20	<24h	大学及以上	无	3	轻度	1	无					4		32	7		5							90	100	90	82	80	100	100	88	75	90.5	92	91.25		1	0	1	0
彭金凤	847	NMM	汉族	18	1.58	58	23.2335	15-20岁	<20	>72h	大学及以上	无	2	轻度	1	有					4		56	9		10							90	75	74	72	55	100	0	60	25	77.75	53.75	65.75		0	0	1	0
高学萍	851	NMM	汉族	18	1.6	57	22.2656	10-15岁	<20	<24h	大学及以上	无	5	中度	4	有					10		48	11		11							80	100	84	62	30	100	0	44	75	81.5	43.5	62.5		1	2	1	0
林冰洁	853	NMM	汉族	18	1.58	48	19.2277		<20	<24h	大学及以上	无	5	中度	4	有					6		54	8		7							90	100	84	55	65	100	66.67	56	25	82.25	71.9175	77.0837		1	1	1	0
张馨月	856	NMM	汉族	18	1.65	49	17.9982	10-15岁	<20	<24h	大学及以上	无	3	轻度	1	有					4		42	8		2							95	100	90	72	75	100	33.33	76	50	89.25	71.0825	80.1663		1	1	1	0
张悦歌	857	NMM	汉族	18	1.67	62	22.231	15-20岁	<20	<24h	大学及以上	无	5	中度	3	有					10		55	5		6							90	100	84	82	75	100	33.33	76	100	89	71.0825	80.0413		0	1	1	0
张羡辰	860	NMM	汉族	18	1.63	46	17.3134		<20	<24h	大学及以上	无	5	中度	1	有					8		55	9		5							100	100	74	62	70	100	33.33	72	75	84	68.8325	76.4163		2	2	2	0
黄敬	861	NMM	汉族	20	1.6	53	20.7031	15-20岁	<20	<24h	大学及以上	无	5	中度	2	有					4		33	14		3							95	0	62	55	60	100	0	56	75	53	54	53.5		1	1	2	0
王佳慧	862	NMM	汉族	17	1.65	56.4	20.7163		<20	<24h	大学及以上	无	5	中度	4	无					16		48	18		15							85	100	84	52	35	100	0	32	100	80.25	41.75	61		1	0	2	1
罗琴	865	NMM	汉族	18	1.63	62	23.3355		<20	<24h	大学及以上	无		轻度	1	有					4		44	8		7							95	75	74	45	55	100	0	68	25	72.25	55.75	64		1	1	2	0
刘知语	866	NMM	汉族	18	1.74	60	19.8177	5-10岁	<20	<24h	大学及以上	无	3	轻度	1	有					7		52	2		13							95	100	90	62	70	100	100	60	50	86.75	82.5	84.625		1	2	2	0
陈思言	868	NMM	汉族	18	1.67	55	19.721	15-20岁	<20	<24h	大学及以上	有	3	轻度	3	有					6		40	9		13							100	100	84	60	65	100	100	72	75	86	84.25	85.125		1	0	2	0
牟心华	872	NMM	汉族	18	1.6	47	18.3594	15-20岁	<20	<24h	大学及以上	无		轻度	1	有					6		50	14		5							90	25	74	47	60	87.5	33.33	64	75	59	61.2075	60.1037		1	1	2	0
何睿玲	874	NMM	汉族	18	1.54	41	17.2879	15-20岁	<20	<24h	大学及以上	无	2	轻度	3	无					6		47	8									80	100	84	57	80	100	100	72	100	80.25	88	84.125		1	2	2	0
张琴	882	NMM	其他	19	1.6	48	18.75	15-20岁	<20	<24h	大学及以上	无	3	轻度	2	有					10		44	8		2							95	25	84	40	80	100	33.33	68	75	61	70.3325	65.6663		1	1	1	0
喻文	883	NMM	汉族	18			20.1525	10-15岁	<20	<24h	大学及以上	无	8	重度	1	有					6		54	3		0							100	100	74	47	80	100	100	72	25	80.25	88	84.125		0	0	0	0
李彤	887	NMM	其他	21	1.62	54	20.5761	10-15岁	<20	<24h	大学及以上	无	4	中度	6	有					6		52	9		4							100	100	84	72	70	100	0	64	50	89	58.5	73.75		0	0	1	0
何沐洁	890	NMM	汉族	17	1.65		20.1525		<20	<24h	大学及以上	无	2	轻度	2	有					11		46	13		16							95	100	84	55	80	100	100	40	50	83.5	80	81.75		0	2	2	0
刘钰霖	892	NMM	汉族	18	1.65	50	18.3655	15-20岁	<20	<24h	大学及以上	无	5	中度	4	有					3		67	7		4							100	25	84	97	80	100	100	84	75	76.5	91	83.75		0	1	2	0
陈欣	896	NMM	汉族	17	1.68	58	20.5499		<20	<24h	大学及以上	无		中度	11	有					2		52	4		4							75	100	62	62	65	100	0	68	75	74.75	58.25	66.5		1	1	1	0
黄小芹	899	NMM	汉族	17	1.51	42	18.4202		<20	<24h	大学及以上	有		重度	1	无					3		45	8		4							95	100	84	57	70	100	66.67	60	50	84	74.1675	79.0837		0	0	2	0
叶青青	901	NMM	汉族	19	1.55	45	18.7305	10-15岁	<20	<24h	大学及以上	无	3	轻度	5	无					7			20		9							95	100	70	42	75	100	0	68	50	76.75	60.75	68.75		0	1	2	0
梁翰文	902	NMM	汉族	19	1.67	51	18.2868	10-15岁	<20	<24h	大学及以上	有	5	中度	1	有					9			14		7							90	100	62	87	60	100	33.3	60	50	84.75	63.325	74.0375		1	0	2	0
郭博宇	905	NMM	汉族	18	1.58	44	17.6254	5-10岁	<20	<24h	大学及以上	有	3	轻度	1	有					8			17		7							100	100	90	77	65	100	66.7	75	25	91.75	76.675	84.2125		1	1	0	0
陈韵洁	909	NMM	汉族	18	1.7	55	19.0311	10-15岁	<20	<24h	大学及以上	无	5	中度	1	无					2			4									100	100	74	82	75	100	100	68	50	89	85.75	87.375		1	2	2	0
张静	910	NMM	汉族	18	1.66	55	19.9594	15-20岁	<20	<24h	大学及以上	无		中度	3	有					8			10									90	75	72	52	60	100	66.7	64	50	72.25	72.675	72.4625		1	1	1	0
熊雅鑫	912	NMM	汉族	17	1.64	48	17.8465	15-20岁	<20	<24h	大学及以上	无	4	中度	4	无					12			19		19							85	25	62	35	65	90	0	80	50	51.75	58.75	55.25		1	3	1	1
宿颖萱	913	NMM	汉族	18	1.58	53	21.2306	10-15岁	<20	<24h	大学及以上	无	5	中度	1	无					2			5		3							100	75	84	97	75	100	100	68	100	89	85.75	87.375		1	0	0	0
尹欣雨	914	NMM	汉族	19	1.65	70	25.7117		<20	<24h	大学及以上	无		轻度	2	有					5			8		10							95	100	85	45	60	100	66.7	80	50	81.25	76.675	78.9625		1	1	0	0
叶佳炜	917	NMM	汉族	18	1.57	40	16.2278	15-20岁	<20	<24h	大学及以上	无		中度	3	有					4			7		4							90	75	74	40	40	100	33.3	68	50	69.75	60.325	65.0375		0	0	0	0
谭雅文	922	NMM	汉族	18	1.6	45	17.5781		<20	<24h	大学及以上	无	5	中度	4	有					2			7		4							85	50	74	67	75	100	0	64	50	69	59.75	64.375		1	1	2	0
任真	925	NMM	汉族	18	1.63	44	16.5607		<20	<24h	大学及以上	无		中度	1	有					0			3		2							100	100	90	77	80	100	100	80	50	91.75	90	90.875		0	0	0	0
张京燕	926	NMM	汉族	19	1.5	45	20		<20	<24h	大学及以上	无	5	中度	2	有					5			11		7							90	100	90	57	65	100	66.7	61	75	84.25	73.175	78.7125		1	2	2	0
刘思雨	931	NMM	汉族	18	1.59	42	16.6133		<20	<24h	大学及以上	无	4	中度	4	有					16			14		11							85	0	62	40	50	50	0	55	25	46.75	38.75	42.75		0	0	0	0
杨柯	933	NMM	汉族	18	1.75	55	17.9592	10-15岁	<20	<24h	大学及以上	有		中度	1	无					4			1		5							90	100	84	45	50	100	0	56	75	79.75	51.5	65.625		2	0	2	0
黄学铃	937	NMM	汉族	18	1.57	48	19.4734		<20	<24h	大学及以上	无	8	重度	3	有					9			9		7							100	25	84	67	45	100	0	48	50	69	48.25	58.625		0	0	0	0
秦思佳	943	NMM	汉族	19	1.63	42	15.8079	15-20岁	<20	<24h	大学及以上	无	2	轻度	1	有					2			5		3							100	100	74	55	65	100	66.7	64	50	82.25	73.925	78.0875		0	0	1	0
张璐瑶	945	NMM	汉族	18	1.58	55	22.0317		<20	<24h	大学及以上	无	4	中度	1	有					7			8		3							100	100	84	87	55	100	33.3	48	50	92.75	59.075	75.9125		0	0	1	0
李文睿	946	NMM	汉族	18	1.65	75	27.5482	10-15岁	<20	<24h	大学及以上	无	4	中度	1	有					8			17		15							85	100	74	40	60	100	33.3	64	50	74.75	64.325	69.5375		1	1	1	0
唐珊	947	NMM	汉族	18	1.63	63	23.7118	10-15岁	<20	<24h	大学及以上	无	1	轻度	1	无					6			9		7							100	100	90	72	60	100	100	64	50	90.5	81	85.75		0	0	1	0
张怡	948	NMM	汉族	17	1.65	65	23.8751	10-15岁	<20	<24h	大学及以上	无	4	中度	1	有					4			2		4							90	100	60	100	80	100	100	76	50	87.5	89	88.25		0	1	1	0
冯依娇	949	NMM	汉族	18	1.6	56	21.875	10-15岁	<20	<24h	大学及以上	有	3	轻度	8	无					7			33		16							95	75	74	50	60	100	0	68	75	73.5	57	65.25		0	0	2	0
王诗涵	950	NMM	汉族	18	1.62	57	21.7193	15-20岁	<20	<24h	大学及以上	无	1	轻度	1	有					4			4		10							100	100	74	72	75	100	66.7	60	50	86.5	75.425	80.9625		2	0	1	0
邓红	956	NMM	汉族	19	1.62	52	19.8141	10-15岁	<20	<24h	大学及以上	无	3	轻度	3	有					8			12		8							90	100	74	55	45	100	66.67	64	50	79.75	68.9175	74.3337		0	0	0	0
王淅沥	958	NMM	汉族	18	1.6	53	20.7031		<20	<24h	大学及以上	无		中度	4	有					9			3		21							90	0	64	45	55	100	33.33	60	50	49.75	62.0825	55.9162		1	1	1	0
江瑶	960	NMM	汉族	18	1.58	48	19.2277		<20	<24h	大学及以上	无	5	中度	1	有					4			3		8							100	75	84	72	65	100	100	76	75	82.75	85.25	84		1	1	1	0
王菡	969	NMM	汉族	17	1.57	41	16.6335		<20	<24h	大学及以上	无		中度	4	无					2			9									100	100	90	60	60	100	100	68	50	87.5	82	84.75		1	0	1	0
熊俊	970	NMM	汉族	18	1.6	55	21.4844	15-20岁	<20	<24h	大学及以上	无	2	轻度	8	有					13			25		19							75	25	90	35	65	100	66.67	68	0	56.25	74.9175	65.5837		1	3	1	2
邱阿秀	971	NMM	其他	19	1.57	52	21.0962		<20	<24h	大学及以上	无	5	中度	1	有					7			14		10							100	75	62	60	60	100	0	56	50	74.25	54	64.125		2	2	1	0
黄博文	972	NMM	汉族	18	1.74	56	18.4965	15-20岁	<20	<24h	大学及以上	有	2	轻度	1	有					6			7		16							95	25	90	52	75	100	0	72	75	65.5	61.75	63.625		1	1	2	1
肖欣雪	975	NMM	其他	20	1.58	57	22.8329	5-10岁	<20	<24h	大学及以上	无	2	轻度	1	有					6			3		1							95	100	62	62	55	100	33.33	60	75	79.75	62.0825	70.9163		0	0	0	0
谢丽娟	977	NMM	汉族	18	1.58	60	24.0346		<20	<24h	大学及以上	无	2	轻度	3	有					0			5		3							90	100	62	77	65	100	100	72	50	82.25	84.25	83.25		1	0	0	0
张琳荟	984	NMM	汉族	18	1.62	60	22.8624	10-15岁	<20	<24h	大学及以上	无	5	中度	1	有					16			9		8							85	100	90	52	55	100	66.67	60	50	81.75	70.4175	76.0837		1	1	2	0
陈雯凤	989	NMM	汉族	19	1.62	48	18.2899	15-20岁	<20	<24h	大学及以上	无	8	重度	4	有					8			11		9							95	50	74	45	80	75	0	80	75	66	58.75	62.375		1	1	2	0
李慧	991	NMM	汉族	19	1.62	52	19.8141		<20	<24h	大学及以上	无	5	中度	1	有					5			12									80	100	74	57	65	100	0	52	50	77.75	54.25	66		1	1	1	0
郭晓燕	992	NMM	汉族	20	1.55	45	18.7305	15-20岁	<20	<24h	大学及以上	有	7	重度	15	无					13			20		14							95	100	90	40	60	100	33.33	64	0	81.25	64.3325	72.7913		3	3	2	1
罗淦	994	NMM	汉族	19	1.58	48	19.2277	10-15岁	<20	<24h	大学及以上	无	5	中度	1	有					2			2		2							90	25	74	72	80	100	0	84	100	65.25	66	65.625		1	0	1	0
陈丽萍	995	NMM	汉族	18	1.63	51	19.1953		<20	24-72h	大学及以上	无	4	中度	2	有					15			22		15							15	100	84	50	40	100	100	48	50	62.25	72	67.125		1	1	2	1
华成玉	997	NMM	汉族	18	1.57	55	22.3133	10-15岁	<20	<24h	大学及以上	无	5	中度	1	有					9			20		16							50	100	84	52	40	87.5	100	40	50	71.5	66.875	69.1875		3	2	2	2
李世芳	1001	NMM	汉族	19	1.65	53	19.4674	15-20岁	<20	<24h	大学及以上	无	2	轻度	4	有					1			2		7							95	100	90	52	70	100	66.67	76	50	84.25	78.1675	81.2087		1	0	1	0
冯子洛	1003	NMM	汉族	18	1.58	43	17.2248	10-15岁	<20	<24h	大学及以上	无	5	中度	3	有					14			11		11							95	75	62	45	60	100	33.33	68	100	69.25	65.3325	67.2913		0	0	0	0
杨平娅	1005	NMM	其他	17	1.54	47	19.8178		<20	<24h	大学及以上	无	2	轻度	5	无					4			6		4							95	75	84	45	65	100	0	72	50	74.75	59.25	67		1	0	0	0
余群	1006	NMM	汉族	19	1.68	52	18.424	15-20岁	<20	<24h	大学及以上	无	5	中度	1	有					10			8		7							85	50	74	50	50	100	0	36	75	64.75	46.5	55.625		2	1	1	0
李菊邦	1008	NMM	其他	19	1.73	53	17.7086	15-20岁	<20	<24h	大学及以上	无	2	轻度	9	有					4			14		4							100	75	74	62	75	100	233.33	40	55	77.75	112.082	94.9163		1	1	2	1
陈文倩	1009	NMM	汉族	18	1.5	44	19.5556	15-20岁	<20	<24h	大学及以上	无	2	轻度	6	有								6		3							100	100	84	82	60	100	100	60	50	91.5	80	85.75		0	0	0	0
李晶	1010	NMM	汉族	19	1.65	51	18.7328	5-10岁	<20	<24h	大学及以上	无	4	中度	4	有					2			6		4							95	50	52	62	85	100	66.67	92	50	64.75	85.9175	75.3337		1	0	1	0
黄翼翔	1011	NMM	汉族	18	1.55	46	19.1467		<20	<24h	大学及以上	有	2	轻度	1	无					7			4		2							95	100	84	55	75	100	100	72	75	83.5	86.75	85.125		1	1	1	0
鲁琴	1012	NMM	其他	18	1.6	55	21.4844		<20	<24h	大学及以上	无	2	轻度	2	有								9		7							90	25	84	67	75	100	33.33	64	25	66.5	68.0825	67.2913		1	3	2	2
杨一	1013	NMM	汉族	19	1.55	50	20.8117	5-10岁	<20	<24h	大学及以上	无	7	重度	8	有					8			19		12							80	100	52	30	70	100	100	60	75	65.5	82.5	74		3	1	2	1
廖若永	1014	NMM	汉族	17	1.52	38.5	16.6638	15-20岁	<20	<24h	大学及以上	无	2	轻度	4	有								14		21							100	50	62	50	65	87.5	66.67	52	25	65.5	67.7925	66.6462		3	3	3	3
杜佩恩	1015	NMM	汉族	19	1.54	48	20.2395	15-20岁	<20	<24h	大学及以上	无	2	轻度	4	有								6		6							100	50	74	72	75	100	66.67	64	50	74	76.4175	75.2087		1	1	2	0
吉娅萍	1016	NMM	汉族	18	1.6	68	26.5625		<20	<24h	大学及以上	有	5	中度	5	有					9			6		6							95	0	74	55	80	87.5	0	68	75	56	58.875	57.4375		1	2	2	1
沙石英莫	1021	NMM	其他	21	1.55	41.5	17.2737	5-10岁	<20	<24h	大学及以上	无		轻度	3	有					6		55	9		3							95	75	84	40	65	100	66.67	64	25	73.5	73.9175	73.7087		0	0	0	0
谢欣岑	1022	NMM	汉族	17	1.62	52	19.8141	10-15岁	<20	<24h	大学及以上	无		中度	3	无					2		50	5		5							95	75	74	72	70	100	66.67	80	50	79	79.1675	79.0837		0	0	1	0
沙马阿支	1024	NMM	其他	18	1.58	44	17.6254	10-15岁	<20	<24h	大学及以上	无	6	中度	1	有							47	9		1							90	50	84	57	75	100	0	68	50	70.25	60.75	65.5		1	1	1	0
张冬梅	1026	NMM	汉族	18	1.52	44	19.0443	15-20岁	<20	<24h	大学及以上	无	4	中度	1	有					7		50	2		0							95	25	74	45	50	100	0	72	25	59.75	55.5	57.625		1	1	1	0
张霆	1027	NMM	汉族	19	1.56	74	30.4076	15-20岁	<20	<24h	大学及以上	无	8	重度	2	无					3		50	4		3							100	100	84	47	90	100	100	76	50	82.75	91.5	87.125		0	1	1	0
蒲秀艳	1028	NMM	汉族	18	1.63	51	19.1953	15-20岁	<20	<24h	大学及以上	无	3	轻度	1	有					6		57	13		9							90	0	90	57	80	100	0	64	25	59.25	61	60.125		1	0	2	0
赵霞	1032	NMM	汉族	19	1.63	47	17.6898		<20	<24h	大学及以上	无	5	中度	7	有					4		52	7		4							95	100	74	67	60	100	33.33	60	50	84	63.3325	73.6663		0	1	1	0
杨涵茹	1037	NMM	汉族	18	1.68	66.5	23.5615	10-15岁	<20	<24h	大学及以上	无		重度	1	有					14	有	69	14		20							75	25	62	52	55	100	33.33	60	100	53.5	62.0825	57.7912		0	0	1	0
张淑平	1039	NMM	汉族	17			20.1525	10-15岁	<20	<24h	高中及以下	无	5	中度	13	有							63	16		15		13	14	15			85	50	72	45	45	66.67	33.33	60	25	63	51.25	57.125		2	1	2	0
吴丽娇	1041	NMM	汉族	20	1.52	40	17.313		<20	<24h	大学及以上	无	5	中度	1	有							71	1		4		21	24	22			100	75	42	52	85	88.89	100	72	50	67.25	86.4725	76.8612		0	1	1	1
曾臻（无睡）	1043	NMM	汉族	30	1.58	58	23.2335	15-20岁	20-30	<24h	大学及以上	有	6	中度	5	有							57	2		2		24	24	24			95	100	51	50	70	100	100	84	25	74	88.5	81.25		0	0	0	0
罗容分	1046	NMM	汉族	39	1.6	65	25.3906	35	>30	<24h	大学及以上	无	5	中度	7	有							64	8		12		23	26	16			95	100	42	20	80	88.89	100	68	25	64.25	84.2225	74.2362		1	1	1	0
海玥	1047	NMM	汉族	24	1.7	62	21.4533	17	<20	<24h	大学及以上	无	5	中度	3	有							55	25		20		15	20	16			85	0	62	35	40	55.56	0	48	25	45.5	35.89	40.695		2	3	3	0
沈丽琼	1051	NMM	汉族	36	1.5	44	19.5556		20-30	24-72h	大学及以上	无	4	中度	3	有							51	9		4							95	100	62	45	55	100	100	80	50	75.5	83.75	79.625		0	1	2	1
李群英	1055	NMM	汉族	49	1.52	44.5	19.2607	41	>30	<24h	大学及以上	有	9	重度	1	有							58	17		13		24	21	24			90	100	72	87	75	88.89	66.67	76	25	87.25	76.64	81.945		1	3	3	3
王艳	1058	NMM	汉族	37	1.55	53	22.0604	27	20-30	>72h	大学及以上	无	3	轻度	25	有							65	9		7		26	22	20			100	0	52	45	35	33.33	0	48	50	49.25	29.0825	39.1662		2	2	2	1
任茜（无睡）	1060	NMM	汉族	37	1.58	58	23.2335	22	20-30	<24h	高中及以下	无	5	中度	2	有							71	4		4		23	22	26			90	100	62	82	75	88.89	100	80	75	83.5	85.9725	84.7362		0	0	0	0
李瑶玲	1062	NMM	汉族	24	1.58	45	18.026	18	<20	<24h	大学及以上	无	8	重度	2	有							76	23		23		13	12	15			80	75	61	40	35	88.89	0	48	50	64	42.9725	53.4862		1	3	1	0
敬树花	1068	NMM	汉族	45			20.1525	30	20-30	<24h	大学及以上	无	5	中度	4	有							61	12		7		24	21	21			100	100	62	40	55	88.89	100	72	50	75.5	78.9725	77.2362		1	0	0	1
敬春燕	1082	NMM	汉族	34	1.6	57.5	22.4609		20-30	<24h	高中及以下	无	5	中度	3	有							76	14		4		27	23	24			95	100	62	67	95	100	100	96	50	81	97.75	89.375		0	0	0	0
伍红梅	1084	NMM	汉族	49	1.62	59	22.4813	47	>30	<24h	高中及以下	无	4	中度	2	有							66	10		5		20	13	9			90	0	41	57	70	66.67	33.33	52	50	47	55.5	51.25		1	0	0	0
董二梅（无睡）	1085	NMM	汉族	32	1.6	60	23.4375	26	20-30	>72h	大学及以上	无	6	中度	5	无							66	12		4		28	24	24			90	50	62	22	75	44.44	33.33	52	50	56	51.1925	53.5962		0	0	0	0
赵小兰	1087	NMM	汉族	34	1.62	60	22.8624	25	20-30	24-72h	大学及以上	无	8	重度	2	有							73	15		8		22	26	26			90	25	51	57	50	77.78	33.33	32	25	55.75	48.2775	52.0138		1	1	0	0
杨小梅	1088	NMM	汉族	22	1.68	55	19.487	16	<20	<24h	大学及以上	有	5	中度	4	有							63	9		11		7	16	11			90	50	32	52	70	88.89	66.67	60	75	56	71.39	63.695		1	1	0	0
夏怡	1089	NMM	汉族	16	1.66	65	23.5883	14	<20	24-72h	高中及以下	无	8	重度	4	有							72	12		13		4	21	21			95	75	42	45	15	77.78	0	48	75	64.25	35.195	49.7225		1	1	2	0
蒋慕岑	1090	NMM	汉族	21	1.6	43	16.7969	13	<20	<24h	大学及以上	无	7	重度	3	有							65	5		4		18	22	22			90	0	41	60	65	88.89	67	76	50	47.75	74.2225	60.9862		0	0	1	0
涂爱玲	1093	NMM	汉族	18	1.58	48	19.2277	17	<20	<24h	大学及以上	无	9	重度	4	有							62	15		11		24	20	23			75	0	72	47	80	100	66.67	68	50	48.5	78.6675	63.5838		1	0	1	0
吴妮芮	1098	NMM	汉族	23	1.65	63	23.1405	21	20-30	<24h	大学及以上	无	7	重度	1	有							56	5		5		25	22	22			65	50	22	35	70	88.89	33.33	44	25	43	59.055	51.0275		1	0	1	0
刘秀蓉（）	1104	NMM	汉族	59	1.59	69	27.2932	10	<20	24-72h	高中及以下	无		重度	2	有																	90	100	41	25	85	100	100	68	25	64	88.25	76.125		1	2	2	2
张东梅（）	1110	NMM	汉族	38	1.59	58	22.9421	35	>30	<24h	高中及以下	有		中度	3	无																	100	100	72	90	85	100	100	72	50	90.5	89.25	89.875		0	0	0	0
李明芬（）	1118	NMM	汉族	47	1.56	52	21.3675	18	<20	24-72h	高中及以下	无		重度	30	有																	85	0	51	5	50	44.44	0	36	50	35.25	32.61	33.93		2	3	3	3
陈列（）	1122	NMM	汉族	34	1.6	57	22.2656	27	20-30	<24h	高中及以下	无	8	重度	1	有																	85	25	51	15	45	77.78	33.33	44	25	44	50.0275	47.0138		3	3	1	0
梁碧英（）	1124	NMM	汉族	42	1.55	50	20.8117	30	20-30	<24h	高中及以下	无		中度	1	有																	65	0	62	30	55	66.67	33.33	48	75	39.25	50.75	45		2	2	2	3
张利斌()	1127	NMM	汉族	65	1.45	55	26.1593	24	20-30	<24h	高中及以下	无		重度	30	有																	90	100	32	50	50	77.78	100	40	25	68	66.945	67.4725		0	0	0	0
贺中翠（）	1129	NMM	汉族	60	1.6	60	23.4375		>30	>72h	高中及以下	无		重度	20	有																	55	0	60	25	20	44.44	66.67	24	25	35	38.7775	36.8888		1	1	0	2
许丽丽（）	1133	NMM	汉族	25	1.56	47	19.313	23	20-30	<24h	高中及以下	无		重度	4	有																	95	75	62	45	70	88.89	100	48	75	69.25	76.7225	72.9862		0	2	0	0
张小琴（）	1136	NMM	汉族	35	1.6	58	22.6562		20-30	<24h	高中及以下	无		轻度	5	无																	80	100	61	70	85	77.78	100	56	100	77.75	79.695	78.7225		1	1	0	0
彭清梅()	1137	NMM	汉族	31	1.6	50	19.5312	22	20-30	<24h	高中及以下	无		中度	4	有																	90	50	41	30	60	44.44	33.33	16	100	52.75	38.4425	45.5962		1	1	0	0
李小英（）	1139	NMM	汉族	22	1.56	55	22.6003	13	<20	>72h	大学及以上	无	8	重度	1	有																	100	100	61	75	60	100	0	56	50	84	54	69		1	0	1	0
王金莲（）	1140	NMM	汉族	49	1.6	60	23.4375	10-15岁	20-30	<24h	高中及以下	无		中度	30	有																	100	100	62	25	80	88.89	100	72	0	71.75	85.2225	78.4862		0	0	0	0
李阳春（）	1144	NMM	汉族	30	1.63	55	20.7008	28	20-30	<24h	高中及以下	无	5	中度	1	有																	100	100	62	55	80	77.78	33.33	68	25	79.25	64.7775	72.0138		0	0	0	0
吴群华（）	1155	NMM	汉族	39	1.6	52	20.3125		20-30	<24h	高中及以下	无		重度	1	有																	100	100	70	75	80	77.78	100	60	50	86.25	79.445	82.8475		1	1	0	0
李素君（）	1157	NMM	汉族	42	1.6	53	20.7031	30	20-30	<24h	高中及以下	有		中度	3	无																	100	100	61	25	70	88.89	100	68	25	71.5	81.7225	76.6112		1	0	1	1
李倩楠（）	1166	NMM	汉族	22	1.58	51	20.4294	18	<20	<24h	大学及以上	无		轻度	1	有																	100	100	90	95	80	100	66.67	76	100	96.25	80.6675	88.4587		3	3	3	0
唐乙萍（）	1167	NMM	汉族	21	1.56	53.5	21.9839	16	<20	<24h	大学及以上	无		轻度	1	有																	100	50	88	60	80	100	33.33	76	50	74.5	72.3325	73.4163		3	0	1	0
周燕蓉（）	1168	NMM	汉族	40	1.6	55	21.4844	14	<20	<24h	大学及以上	有	2	轻度	25	有																	100	75	62	55	70	88.89	66.67	60	25	73	71.39	72.195		1	2	2	1
任烨华（）	1173	NMM	汉族	42	1.45	53.3	25.3508	30	20-30	<24h	高中及以下	无	8	重度	10	有																	85	0	42	45	30	77.78	0	56	25	43	40.945	41.9725		0	0	0	0
李兰（）	1174	NMM	汉族	33	1.62	60	22.8624	31	>30	<24h	大学及以上	无		中度	2	有																	90	75	62	50	80	88.89	66.67	48	50	69.25	70.89	70.07		2	1	2	2
刘宇（）	1178	NMM	汉族	22	1.63	46	17.3134	22	20-30	<24h	大学及以上	有		轻度	2	有																	95	0	31	35	60	22.22	66.67	36	75	40.25	46.2225	43.2362		1	1	0	0
韩琴（）	1179	NMM	汉族	33	1.57	58	23.5304	26	20-30	<24h	大学及以上	无	7	重度	2	有																	100	100	62	20	60	66.67	66.67	32	0	70.5	56.335	63.4175		1	1	2	0
汪雪英（）	1190	NMM	汉族	26	1.56	55	22.6003	16	<20	<24h	高中及以下	无	4	中度	2	有																	95	100	72	45	60	88.89	66.67	80	75	78	73.89	75.945		0	1	3	3
马正群（）	1201	NMM	汉族	52	1.58	65	26.0375	35	>30	<24h	高中及以下	无		轻度	5	无																	90	50	52	45	65	66.67	66.67	80	25	59.25	69.585	64.4175		2	3	2	3
陈雪梅（）	1203	NMM	汉族	37	1.65		20.1525	34	>30	<24h	高中及以下	有	2	轻度	1	有																	100	100	72	100	40	77.78	100	92	50	93	77.445	85.2225		0	2	0	0
高兴淑（）	1205	NMM	汉族	51	1.68	54	19.1327	48	>30	>72h	高中及以下	无	8	重度	15	有																	85	0	60	95	45	66.67	0	44	0	60	38.9175	49.4588		3	3	0	1
贾向蓉（）	1210	NMM	汉族	46	1.55	50	20.8117	30	20-30	<24h	高中及以下	无	8	重度	15	有																	50	75	72	40	40	55.56	66.67	48	75	59.25	52.5575	55.9038		1	2	3	3
韩元珍（）	1213	NMM	汉族	66	1.6	60	23.4375	63	>30	<24h	高中及以下	无		中度	6	无																	70	0	41	50	55	55.56	0	60	0	40.25	42.64	41.445		2	2	0	1
邓晓矾（）	1218	NMM	汉族	22	1.55	53	22.0604	10	<20	24-72h	高中及以下	无	5	中度	1	有																	80	100	62	45	30	100	0	32	50	71.75	40.5	56.125		2	1	0	0
龙莉（）	1220	NMM	其他	28	1.62		20.1525	22	20-30	<24h	高中及以下	无	7	重度	2	有																	70	50	42	40	40	55.56	0	52	50	50.5	36.89	43.695		2	2	3	3
王璇（）	1224	NMM	汉族	15	1.67	51	18.2868	14	<20	<24h	高中及以下	无		中度	4	无																	75	0	70	40	75	44.44	66.67	48	50	46.25	58.5275	52.3888		2	1	2	0
何思静（）		NMM	汉族	33	1.57	58	23.5304	26	20-30	<24h	大学及以上	无	5	中度	4	有																	95	100	62	65	55	77.78	100	56	25	80.5	72.195	76.3475
[truncated: 4 more columns]
